**Fibrinogen and Complement Factor H are promising CSF protein biomarker(s) for Parkinson's disease with cognitive impairment- A Proteomics and ELISA based study**

Aditi Naskar<sup>1a</sup>, Albert Stezin<sup>2a</sup>, Arpitha Dharmappa<sup>3a</sup>, Shantala Hegde<sup>3a</sup>, Mariamma Philip<sup>4a</sup>,  
Nitish Kamble<sup>6a</sup>, Jitender Saini<sup>5a</sup>, Ravi Yadav<sup>6a</sup>, Sandhya K<sup>7b</sup>,  
Utpal Tatu<sup>8c</sup>, Pramod Kumar Pal<sup>6a#</sup>, Phalguni Anand Alladi<sup>1a\*</sup>

1. Department of Clinical Psychopharmacology & Neurotoxicology 2. Department of Clinical Neurosciences 3. Department of Clinical Psychology 4. Department of Biostatistics 5. Department of Neuroimaging & Interventional Radiology 6. Department of Neurology 7. Department of Anaesthesiology 8. Department of Biochemistry

- a. National Institute of Mental Health and Neuro Sciences, Bengaluru, India
- b. Bangalore Medical College and Research Institute, Bengaluru, India
- c. Indian Institute of Science, Bengaluru, India

|                                                                                                                                                                                                                                                                                                                             |                                                                                                                                                                                                                                                                                                                     |
|-----------------------------------------------------------------------------------------------------------------------------------------------------------------------------------------------------------------------------------------------------------------------------------------------------------------------------|---------------------------------------------------------------------------------------------------------------------------------------------------------------------------------------------------------------------------------------------------------------------------------------------------------------------|
| <p>*Corresponding Author:<br/>Dr. Phalguni Anand Alladi<br/>Senior Scientific Officer- Scientist 'F'<br/>Department of Clinical Psychopharmacology and Neurotoxicology<br/>National Institute of Mental Health &amp; Neuro Sciences, Hosur Road Bengaluru, 560029, Karnataka, INDIA<br/>Email: alladiphalguni@gmail.com</p> | <p># Joint Corresponding Author<br/>Dr. Pramod Kumar Pal<br/>Professor, Department of Neurology,<br/>NIMHANS Parkinson's Disease &amp; Movement Disorders Subspeciality,<br/>National Institute of Mental Health &amp; Neuro Sciences, Hosur Road Bengaluru, 560029, Karnataka, INDIA<br/>palpramod@hotmail.com</p> |
|-----------------------------------------------------------------------------------------------------------------------------------------------------------------------------------------------------------------------------------------------------------------------------------------------------------------------------|---------------------------------------------------------------------------------------------------------------------------------------------------------------------------------------------------------------------------------------------------------------------------------------------------------------------|

## Abbreviations

ACN: Acetonitrile

AD: Alzheimer's disease

AHSG: Fetuin-A

ANT: Animal naming test

ApoA-I: Apolipoprotein A1

ApoA-II: Apolipoprotein AII

ApoA-IV: Apolipoprotein- AIV

APP: Amyloid precursor protein

AVLT: Auditory verbal learning test

CFH/ CFAH: Complement factor H (Gene = *CFH*; protein = CFAH)

CFT: Complex figure test

CHI3L1: Chitinase-3-like protein 1

CLU: Clusterin

CNDP1: Carnosine dipeptidase I

COWA: Controlled Oral Word Association Test

CP: Ceruloplasmin

CPE: Carboxypeptidase E

CSF: Cerebrospinal fluid

CT: Color trails test

DKK3: Dickkopf 3

DLB: Dementia with Lewy bodies

DTT: Dithiothreitol

DWI: Diffusion weighted imaging

ELISA: Enzyme linked immunosorbent assay

FA: Formic acid

FASTA: Fast adaptive shrinkage thresholding algorithm

FBLN1: Fibulin 1

FGA: Fibrinogen  $\alpha$  chain (Gene = *FGA*; protein = FIBA)

FGB: Fibrinogen  $\beta$  chain (Gene = *FGB*; protein = FIBB)

FGG: Fibrinogen  $\gamma$  chain (Gene = *FGG*; protein = FIBG)

FLAIR: Fluid attenuation inversion recovery

GSN: Gelsolin

HBA: Haemoglobin  $\alpha$  chain

HBB: Haemoglobin  $\beta$  chain

HP: Haptoglobin

HRG: Histidine rich glycoprotein

IAA: Iodoacetamide

IGFBP7: Insulin-like growth factor-binding protein 7

IGHA2: Immunoglobulin heavy constant  $\alpha$  2

iTRAQ: Isobaric tags for relative and absolute quantitation

LC/MS-MS: Liquid chromatography mass spectrometry

LFQ: Label free quantitation

LRG1: Leucine-rich  $\alpha$ -2 – glycoprotein

MDS: Movement disorders society

MOCA: Montreal cognitive assessment test

MRI: Magnetic resonance imaging

MSA: Multiple system atrophy

NCHL1: Neural cell adhesion molecule L1 like protein

NELL2: Neural EGFL like 2

NNC: Non-neurological control

NPH: Normal pressure hydrocephalus

NPTXR: Neuronal pentraxin receptor

NRCAM: Neuronal cell adhesion molecule

ORM1: Orosomucoid 1 or  $\alpha$ -1 acid glycoprotein 1 precursor

ORM2: Orosomucoid 2 or  $\alpha$ -1 acid glycoprotein 2 precursor

PDCI: PD with cognitive impairment

PDD: PD with dementia

PD-MCI: PD with mild cognitive impairment

Q-TOF: Quadrupole time of flight

SCG: Secretogranin

SCG2: Secretogranin-2 precursor

SCG3: Secretogranin 3 precursor

SERPINA1:  $\alpha$ -1 antitrypsin

SERPINA3:  $\alpha$ -1 anti-chymotrypsin

SERPING1: C1-inhibitor

SWI: Susceptibility weighted imaging

THY: Thy-1 membrane glycoprotein

TOL: Tower of London

UPDRS: Unified Parkinson's disease rating scale

VGF: VGF Nerve growth factor

VTN: Vitronectin

WCST: Wisconsin card sorting test

## Graphical abstract

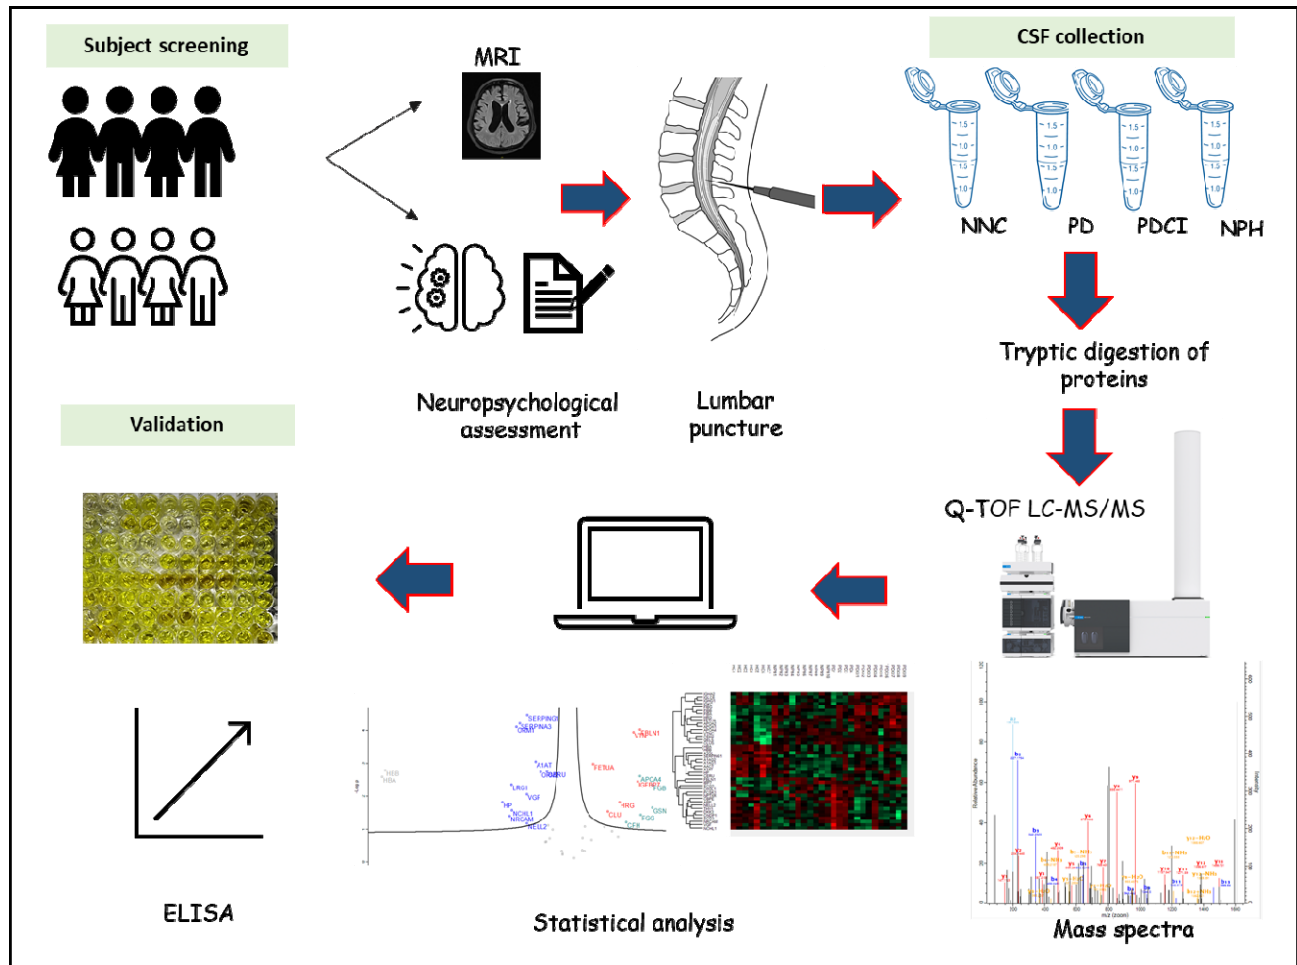

## Abstract

Cognitive impairment is a debilitating non-motor symptom of Parkinson's disease (PD). The diagnosis of PD with cognitive impairment (PDCI) is essentially through clinical and neuropsychological examinations. There is an emerging need to identify biomarker(s) to foresee cognitive decline in PD patients, at an early stage. We performed label-free unbiased non-targeted proteomics (Q-TOF LC/MS-MS) in CSF of non-neurological control (NNC); PDCI; PD and normal pressure hydrocephalus (NPH), followed by targeted ELISA for validation. The diagnosis was confirmed by neuropsychological and MRI assessments prior to CSF collection. Of the 282 proteins identified by mass spectrometry, 42 were differentially altered in PD, PDCI and NPH. Further, 28 proteins were altered in PDCI and 25 in NPH. An interesting overlap of certain proteins was noted both in PDCI and NPH. Five significantly upregulated proteins in PDCI were fibrinogen, gelsolin, complement factor-H, apolipoprotein A-IV and apolipoprotein A-I. Whereas carnosine dipeptidase 1, carboxypeptidase E, dickkopf 3 and secretogranin 3 precursor proteins were down-regulated. NPH also had few uniquely altered proteins viz. insulin-like growth factor-binding protein, ceruloplasmin,  $\alpha$ -1 antitrypsin, VGF nerve growth factor, neural cell adhesion molecule L1 like protein. Interestingly, the ELISA-derived protein concentrations correlated well with the neuropsychological scores of certain cognitive domains. Executive function was affected both in PDCI and NPH. In PD, Wisconsin card sorting test (WCST) percentile correlated positively with ApoA-IV and negatively with the ratio of ApoA-I:ApoA-IV. Thus assessment of a battery of proteins like fibrinogen- $\alpha$ -chain, CFAH and ApoA-I:ApoA-IV ratio alongside neuropsychological could be reliable biomarkers to distinguish PDCI and NPH.

**Key words:** Parkinson's disease, cognitive deficits, Parkinson's disease with dementia, normal pressure hydrocephalus, label-free unbiased proteomics, MaxQuant, Perseus

## **Background**

Currently, the understanding of Parkinson's disease (PD) has shifted from being a completely motor disorder to a multisystem disorder that is accompanied by non-motor symptoms. Cognitive impairment is the most widespread and debilitating non-motor symptom of PD. It ranges from tenuous cognitive decline in mild cognitive impairment (MCI) to severe cognitive impairment resulting in dementia i.e. PD with dementia (PDD). The term mild cognitive impairment (MCI) is often used in Alzheimer's disease (AD) as a transitional state between normal cognition and dementia [1] and has been recently introduced in the investigations related to PD [2]. Dementia is a major late-stage cognitive complication of PD. As per the Sydney multicenter longitudinal study (20 years follow-up), about 20-33% of the PD patients suffered from mild cognitive impairment (MCI) at the time of diagnosis and 80% developed dementia over the course of the disease [3]. In India, a hospital based 7 years longitudinal study showed cognitive impairment in 49% of PD patients [4]. The disease phenotype of PDD often resembles that of dementia with Lewy bodies. Therefore, the symptoms of dementia must appear at least one year after the motor impairment, for it to be termed as PDD [5]. If dementia predates PD or is diagnosed within one year of motor symptoms, the patients are categorized as DLB [5]. The pathology underlying cognitive impairment in PDD is heterogeneous and includes Lewy bodies (LB), neurofibrillary tangles, senile plaques, AD like pathology. The presence of cortical LB is tightly associated with cognitive impairment [6,].

The two different phenotypes of Parkinson's disease with cognitive impairment (PDCI) involve fronto-striatal and postero-cortical regions [7]. The underlying cause of fronto-striatal



phenotypes are loss of dopaminergic neurons and characterized by executive dysfunction such as deficits in planning, working memory, attentional set-shifting, as well as impaired memory recall, reinforcement learning and inhibition [8]. PD patients with fronto-striatal phenotypes are less likely to progress to dementia. The posterior-cortical phenotypes involve additional neurotransmitter deficits, besides dopamine. In this phenotype visuospatial deficits dominate, while deficits in the language and memory co-exist. PD patients with posterior cortical phenotypes are prone to dementia. However, little is known about the pathophysiology of cognitive decline in PD patients.

Normal pressure hydrocephalus (NPH) is a non-neurodegenerative disease characterized by a gamut of symptoms viz. gait disturbance, urinary incontinence and dementia. It is associated with ventricular enlargement with normal intracranial pressure and impaired cerebrospinal fluid (CSF) absorption. The cognitive deficits in NPH include decline in memory, attention and executive functions and is predominated by frontal and subcortical dysfunctions [9]. In view of overlap between the cognitive dysfunctions in PDCI and NPH, we included the latter group as an internal disease control for comparison.

Hitherto, the prediction of the risk and time of onset of cognitive impairments in PD (PDCI) remains clinically daunting due its heterogeneous pathology and overlap with other PD mimics. The final confirmation is possible only at autopsy. This highlights the unmet need to identify biomarker(s) to predict PDCI at an early stage. A biomarker is “a characteristic that is objectively measured and evaluated as an indicator of normal biological processes, pathogenic processes, or pharmacologic responses to a therapeutic intervention.” (Biomarkers Definitions Working Group: NIH). Most biomarker studies conducted till date for PDCI, focused on targeted CSF markers of AD i.e. A $\beta$ 42, T-tau & P-tau; whereas only a handful used non-targeted

proteomics [10]. The proteins like ApoA-I and clusterin identified by non-targeted proteomics did not match those reported in PD pathogenesis [10]. Similarly, inconsistencies plague the findings of total CSF  $\alpha$ -synuclein in different studies, since a set of studies showed reduced levels in PDD [11, 12] while others showed an increase [13]. A thin overlap between AD and PDCI pathologies pushes a likelihood of independent pathways in PDCI as against AD.

We initiated the study by estimating  $\alpha$ -synuclein levels in PDCI-CSF by ELISA, to verify findings of the studies reported elsewhere. In view of inconclusive results, we used unbiased label-free LC-MS/MS mass spectrometry. We further validated the significantly upregulated proteins by ELISA. The CSF samples of non-neurological controls NNC, PD, PDCI and NPH were investigated simultaneously.

## **Materials & Methods**

### **Subject recruitment and clinical evaluation**

The study was approved by the institutional human ethics committee [IEC No. NIMHANS/1st IEC (BS & NS DIV.)/2016]. All subjects/patients were recruited after obtaining written informed consent and documentation of their demographic details (Table. 1). PD, PDCI and NPH Patients were recruited over a period of 3 years (2016-2018) from the movement disorders outpatient clinic at the department of Neurology, National Institute of Mental Health & Neuro Sciences, Bengaluru, India. Idiopathic PD was diagnosed based on the UK Parkinson's Disease Society Brain Bank criteria (UKPDS, Hughes et al. 1993). The clinical details such as, age at onset of motor symptoms, disease duration, UPDRS-III, OFF-ON state scores were documented for each patient. NPH was diagnosed based on the international iNPH and the Japanese iNPH guidelines [14] by movement disorder specialists (AS, NK, RY, & PKP). CSF samples donated by otherwise healthy individuals, not suffering from any neurological or movement disorders and

undergoing spinal anesthesia, were considered as NNC. Their CSF was collected by an anesthetist (SK) at the department of Plastic Surgery, at Bangalore Medical College Research Institute. All patients underwent neurological and cognitive examinations followed by MRI-brain (JS) and routine laboratory investigations. The patients and NNCs were matched for age and socio-economic status.

### **Neuropsychological tests**

We used Montreal cognitive assessment (MOCA) test, with a cut-off score of 26 for neuropsychological screening of patients (n=60). The patients with scores <26 underwent detailed assessment (AD, AN, SH), using selected tests from the NIMHANS neuropsychology battery. The raw scores were compared with age, education, and gender-based norms [15]. A score <15th percentile was considered as a neuropsychological deficit [16]. Five cognitive domains, viz. attention, language, learning and memory, executive function, and visuospatial function were assessed for each patient. Two types of cognitive impairment manifestations were considered to identify PD-MCI and PDD. The PD-MCI was diagnosed based on MDS task force criteria, [17] with abnormalities in two tests under a single cognitive domain or abnormalities in at least one test in two cognitive domains whereas; abnormalities in more than two domains were a pre-requisite for PDD. In view of the small sample size the PD-MCI and PDD patients were grouped together as PDCI. The details of the neuropsychological tests are provided in (Table 2).

### **Neuroimaging methods**

Magnetic resonance imaging (MRI) being a supportive test for NPH, this modality was used to screen PD, PDCI and NPH patients. For the routine diagnostic MRI, T2 weighted imaging (T2 WI) was performed in all three planes (axial, coronal and sagittal) in addition to fluid attenuation inversion recovery (FLAIR), T1 weighted imaging (T1W), diffusion weighted imaging (DWI)

and susceptibility weighted imaging (SWI) in the axial plane. Representative images are provided in supplementary data (S1).

### **Sample collection and handling**

The CSF samples were collected at room temperature by standard lumbar puncture with aseptic precautions and stored in polypropylene tubes. Within half an hour, the samples were centrifuged at 10,000 rpm (Eppendorf USA) for 10 min at 4°C to pellet out cell debris and visually inspected for blood contamination. Blood free samples were stored at -80°C for analysis.

### **Mass spectrometry**

#### **a. Sample filtration, protein estimation and preparation**

All the samples were processed and analyzed individually (NNC, n=7; PD, n=4; PDCI, n= 9; NHP, n=10). We passed 500 µl of CSF through Amicon filter (3 Kda cut-off) and determined protein concentration for 300 µl of the supernatant by Bradford assay. 50 µg of protein (approximately 225 µl) was processed further. Proteins were denatured by heat at 60°C for 10 min. Thereafter the samples were alkylated with 10 µl of 100 mM dithiothreitol (DTT) at 60°C for 25 min to break the disulfide bonds. The alkylated samples were further reduced by 10 µl of 200 mM iodoacetamide (IAA) at room temperature for ~45 min in dark. Thereafter, the samples were digested using trypsin (overnight at 37°C, ratio 1:50), quenched using 10 µl of formic acid and centrifuged for 5 min at 13000 rpm. Post-centrifugation, the supernatant was vacuum dried using a Speed Vac (Eppendorf, USA) and reconstituted with a solution of 0.1% formic acid (FA) and 3% acetonitrile (ACN) in mass spectrometry grade water [18]

### **LC-MS/MS analysis**

Protein detection and identification was performed using Agilent Technologies 6545XT Advance Bio LC/Q-TOF equipped with Agilent 1290 Infinity II LC System. Data acquisition was

controlled by Mass-Hunter workstation data acquisition software (B.08.01, Agilent). The mobile phases used for liquid chromatography included buffers A (Milliq water/0.1% FA) and B (ACN/0.1% FA). We used Agilent Advance Bio Peptide Map (2.1 ×150 mm, 2.7 $\mu$ ) column for chromatography. The peptides were separated by a 125 min gradient at flow rate of 0.4 ml/min. The gradient was as follows: from 2 to 35% buffer B for 100 min, then from 35% to 90% buffer B for 110 min. After rinsing with 90% B for 5 min, the column was equilibrated by 98% buffer A for 10 min. The Advance Bio Q-TOF was operated under capillary voltage of 3500V. The drying gas flow rate and temperature was set at 13 ml/min and 325°C, respectively. The Q-TOF was run in a positive mode and MS scans were run over a range of m/z 300–1700 at 8 spectra/second. Precursor ions were selected for auto MS/MS at an absolute threshold of 1000 and with maximum of 10 precursors per cycle, and active exclusion set at 1 spectra and released after 0.15 min reference mass correction was performed by using mass 922.0097 ( $\pm$ 10 ppm).

### **Mass Spectrometry Data analysis**

The data obtained were subjected to MaxQuant Andromeda software (version 1.6.14.0.) [19] mediated search against the uniprot FASTA dataset of human proteome. The Perseus software version 1.6.14.0 was used to obtain the quantitative data for all peptides by selecting the peak intensities across the whole set of protein intensity measurements. Intensity based ‘label free quantitation (LFQ)’ parameter was applied, values were imported and transformed into logarithmic scale with base 2. Based on the normal distribution, the missing values were imputed. The representative mass spectra of the PDCI group chosen for validation are provided in supplementary results (S2).

We performed one-way ANOVA for the statistical analysis using Perseus software, with  $p < 0.05$  as significant. The data pre-filter was based on presence of valid values in at least 3 samples in

each group. A heat map (fig. 3A) depicts the hierarchical clustering of differentially expressed proteins representing LFQ intensity values, which are equivalent to the expression of proteins. Venn diagrams were plotted using bioinformatics and evolutionary genomics to cluster the overlapping and/or uniquely altered (fig. 3B, 3C). The distribution of LFQ differences (log fold change) (x-axis) and p-value (y-axis) are represented as volcano plots [fig. 4(A-C)] on Perseus following ANOVA (FDR<0.05). A threshold of >1.5 fold change ( $2^{\log \text{ fold change}}$ ) was set as significant upregulation and that of <0.5 was considered as significant down-regulation. Differentially expressed proteins were subjected to gene ontology and gene enrichment analysis using FunRich version 3.1.3. [20]

## **ELISA**

We estimated the levels of  $\alpha$ -synuclein in the CSF of patients using ELISA technique, since it is a reported biomarker for PD and PDCI (NNC, n=5-6; PD, n=6; PDCI, n= 8-11; NHP, n=7-10). Further, we also validated the proteomics findings by ELISA, for 5 significantly upregulated proteins viz. human fibrinogen, gelsolin, CFAH, ApoA-IV and ApoA-I in the CSF. The concentrations were measured in each of the CSF samples using commercially available ELISA kits [ $\alpha$ -synuclein: ab210973; (Human Fibrinogen: ab208036, Human Apolipoprotein A1: ab108804, Human Apolipoprotein A4: ab214567 Human Complement factor H: ab252359], [Human Gelsolin: Immunotag, USA ITRP09965].

## **Statistical analysis**

The ELISA data was analyzed using non-parametric Kruskal Wallis test followed by Dunn's test for post hoc analysis, by Graphpad Prism (version 8). We further correlated the ELISA test results with the neuropsychological test percentiles by group-wise Kendall's correlation and LFQ intensities by Spearman's correlation using SPSS software.

## **Results**

### **Demographic and clinical characteristics**

Demographic analysis (Table. 1) showed higher number of male subjects/patients when compared to females. The mean disease duration for PDCI was 3 years post PD onset. The MOCA scores of PDCI patients confirmed cognitive deficit as they fell below the cut-off score of 26 within a range of (8-24). The median ON state and OFF state scores of PDCI were 41.5 and 47.25, respectively.

### **Neuropsychological and radiological assessment findings:**

The battery of neuropsychological tests revealed that 88% PDCI patients had impairment in attention domain, 63% in language & learning domains, 50% in executive and 50% in visuospatial domain (Table. 1). Interestingly, in comparison to PDCI a higher percentage (83%) of NPH patients showed impairment in executive function whereas equal numbers showed impaired executive function. In PD, only around 17% patients showed cognitive impairment in attention, learning and visuo-spatial domain, although in NNCs it was approximately 50% in learning and 42% visuospatial tasks. Radiological findings by MRI supported the diagnosis of NPH due to the presence of ventricular dilatation, acute callosal angle between the lateral ventricles on coronal MRI images and in cases of PD by the fading of the swallow tail sign suggestive of nigrosome 1 alteration [21].

### **Identification of proteins by unbiased Mass Spectrometry**

The identified proteins (282) are listed in supplementary data (S3-excel). Amongst the 42 differentially expressed proteins, the highly upregulated ones in PDCI were fibrinogen  $\alpha$ ,  $\beta$  and  $\gamma$  chains; gelsolin, *CFH*, ApoA-IV and ApoA-I. Besides, a few proteins showed disease specific alterations (Table 6). The proteins uniquely altered in PDCI (with fold changes in parenthesis)

were immunoglobulin heavy constant  $\alpha$  (6.00), *FGA* (4.53), Apo-AI (1.77), *Apo-AII* (1.73), *CNDP1* (0.56), *DKK3* (0.54), *THY-1* (0.46), *CPE* (0.46), *SCG3* (0.34). Those specific for PD were amyloid precursor protein (*APP*) (3.74), *NPTXR* (3.59), *CHI3L1* (3.27), *SCG2* (3.24). NPH also had specifically altered proteins e.g. *IGFBP7* (3.19), *CP* (0.70), alpha-1 antitrypsin (0.58), VGF nerve growth factor (0.50), *NRCAM* (0.39).

### **Upregulated proteins that may predict cognitive impairment in PD**

ELISA findings suggested that  $\alpha$ -synuclein levels were mildly lower in PDCI when compared to NNC, PD and NPH (fig. 2; NNC vs PDCI  $p = 0.0762$ , PD vs PDCI  $p = 0.8735$  and NPH vs PDCI  $p = 0.1735$ ). We further validated the MS/MS findings by targeted ELISA for each protein. A mild increase in the fibrinogen levels in PDCI was noted in comparison to NNC ( $p = 0.1575$ ); whereas the NPH samples showed significantly higher levels (fig. 5A;  $**p = 0.0032$  NNC vs NPH). Gelsolin was significantly higher in PD (fig. 5B;  $*p = 0.0109$  NNC vs PD) compared to NNC. Interestingly, its levels were low in PDCI (fig. 5B;  $*p = 0.0368$  PD vs PDCI; ANOVA), but failed to show significance following post-hoc analysis (Dunn's correction).

*CFH* showed a mild, non-significant, increase in PDCI compared to PD  $p=0.1030$  (fig. 5C). We found a mild, non-significant, upregulation of ApoA-IV in PDCI and NPH when compared to PD (fig. 5D). The levels of ApoA-I were significantly lower in PDCI than NPH (fig.5E;  $*p=0.0395$  NPH vs PDCI). Interestingly, a significantly high ratio of ApoA-I:ApoA-IV proteins was noted in PDCI in comparison to PD and NPH (fig. 5F;  $*p=0.0456$  NPH vs PDCI).

### **Gene ontology-based analysis**

The proteins altered in PDCI-CSF were associated with various biological processes as well as molecular and cellular components [fig. 6a (A-C); (table. 7 (A-C)]. In PDCI, 32% of the altered proteins (*FGG*, *FGB*, *FGA*, *SERPING1*, *SERPINA3*, *CNDP1*, *CPE*, *SCG3*) were associated with



protein metabolism, (12%) (*AHSG*, *ORM2*, *ORM1*) with immune activity and 64% (*FGG*, *FGB*, *FGA*, *GSN*, *CFH*, *HRG*, *VTN*, *CLU*, *APOA-II*, *APOA-I*, *AHSG*, *SERPING1*, *SERPINA3*, *THY1*, *HP*, *HBB*) showed exosome(s) association and 84 % (*FGG*, *FGB*, *FGA*, *GSN*, *CFH*, *HRG*, *VTN*, *FBLN1*, *CLU*, *APOA-II*, *APOA-I*, *AHSG*, *SERPING1*, *ORM2*, *SERPINA3*, *DKK3*, *ORM1*, *HP*, *LRG1*, *SCG3*, *HBB*) were extracellular. In PD, [fig. 6b (A-C), table.9 (A-C)] 27.3 % of the altered proteins belonged to protein metabolism (*FGB*, *FGG*, *SCG2*), 9% were associated with apoptosis (*HRG*), 18.2% belonged to the extracellular matrix structure (*FBLN1*, *CHI3L1*); and 18.2 % belonged to cytoskeleton (*FGB*, *FGG*) as well as fibrinogen complex (*FGB*, *FGG*). In NPH [fig 6c.(A-C); table.9(A-C)] 22.7% altered proteins were associated with protein metabolism (*FGB*, *FGG*, *SERPINA1*, *SERPING1*, *SERPINA3*) and immune response (*CFH*, *CLU*, *ORM2*, *ORM1*, *HP*); 13.6 % were protease inhibitors (*IGFBP7*, *NRCAM*), defense/immune protein activity (*AHSG*, *ORM2*, *ORM1*) and 18.2% were cytoskeletal proteins.

### **Statistical correlations with ELISA**

Spearman's correlation showed a positive correlation between the LFQ intensity of *FGA* and the ELISA-derived concentration of native fibrinogen ( $\rho = 0.750$ ,  $*p = 0.020$ ). Similarly, CFAH correlated positively with native fibrinogen ( $\rho = 0.460$ ,  $*p = 0.036$ ) (Table.10). We further assessed whether the protein levels correlated with the neuropsychological outcome. A group wise Kendall's correlation analysis (Table. 11) showed a positive correlation between ELISA-derived CFAH concentration and digit vigilance test percentile ( $r = 0.949$ ,  $*p$  value = 0.023). On a similar note the ratio of ApoA-I:ApoA-IV showed a positive correlation ( $r = 0.894$ ,  $*p = 0.037$ ) while ApoA-IV showed a negative correlation with ANT percentile ( $r = -0.894$ ,  $*p = 0.037$ ). ApoA-I correlated positively with verbal N-BACK test ( $r = 0.683$ ,  $*p = 0.033$ ) while fibrinogen showed a negative correlation with WCST ( $r = -0.788$ ,  $*p = 0.032$ ).

Similar correlations were derived for NPH with (i) positive correlation between ApoA-I and MOCA scores ( $r = 0.506$ ,  $*p = 0.046$ ) (ii) a negative correlation between CFAH and COWA (CFAH vs COWA  $r = -0.567$ ,  $*p = 0.049$ ) and WCST percentile ( $r = -0.645$ ,  $*p = 0.036$ ); (iii) negative correlations of ApoA-IV with COWA ( $r = -0.619$ ,  $*p = 0.036$ ); ANT ( $r = -0.618$ ,  $*p = 0.034$ ), Verbal N-BACK 2 ( $r = -0.741$ ,  $*p = 0.012$ ) and AVLT immediate recall (IR) percentiles [ $r = -0.732$ ,  $*p = 0.029$ ] (supplementary table. S1)].

## Discussion

This is the first study to suggest *FGA* as a possible biomarker to distinguish PDCI from NPH, based on LC-MS/MS analysis. Besides, as noted from ELISA-based observations, CFAH could potentially differentiate PDCI from PD. The correlations between the digit-vigilance and N-BACK tests with CFAH and ApoA-IV levels respectively, extend a diagnostic value to these proteins. No studies till date have reported an association of PDCI with these proteins. Further, attention deficit in PDCI and learning deficit in NPH patients [22] could be the non-invasive identifying features, while impairments in language and executive domains were common to both [22, 23]. Thus, a panel of proteins and neuropsychiatric assessments may assist prediction of cognitive decline in PDCI.

Various studies report a direct correlation between LB and cognitive impairment in PD [24, 25,]. Although  $\alpha$ -synuclein is the main constituent of LBs, its reducing levels did not corroborate with UPDRS scores both cross-sectionally and longitudinally [26]. Our observation of mild decrease in  $\alpha$ -synuclein thus matches earlier findings and led us on an exploratory study of non-targeted protein biomarker(s). An iTRAQ and multiple reactions monitoring study showed alterations in 16 proteins between PDD and PD [27]. Our observations on APO proteins in PDCI partly match theirs; albeit the variants are different. Some studies propose alterations in clusterin, gelsolin,

haptoglobin, and ApoA-I [28] in PD, while another showed serpin A1 to predict PDD at an early stage [29]. Our findings thus partly corroborate with these studies in PDCI.

The specific upregulation of *FGA* in PDCI, vis-à-vis that of *FGB* and *FGG* in PD and NPH is intriguing. Fibrinogen is abundant in CSF in neurological disorders and traumatic CNS injury cases with blood brain barrier breach [30, 31]. It is synthesized by neurons and astroglia [32]. The absence of significant differences between controls and PDCI in ELISA findings may be due to the use of whole fibrinogen molecule. Yet, the positive correlation between LFQ intensities of *FGA* and whole fibrinogen, validate the use of latter. Marfà et al, considered lower levels of *FGA*-c-chain as a serum marker for hepatic fibrosis; while proposing that inflammation causes cleavage and release of fibrinogen fragments  $\alpha$ ,  $\beta$  and  $\gamma$  into the bloodstream or CSF. The cleavage sites depend on the disease etiology and mechanisms of protein degradation [33].

Gelsolin is present in the neurons, choroid plexus and CSF. Since it has anti-amyloidogenic properties [34], low levels in PDCI may represent a failed attempt at de-fibrillization whereas, the significant increase in PD may suggest a preserved function of severing of A $\beta$  fibrils.

The alternative pathway of the complement system that guides the innate immunity remains constitutively active to detect pathogens and altered self. CFAH is its prominent regulator [35]. In an ELISA-based study, complement protein C3 and regulatory protein factor H differentiated MSA from PD/AD. A correlation was noted between C3/A $\beta$  and FH/A $\beta$  and the severity of cognitive impairment in PD [36]. Elevated CFAH levels were noted in patients with MCI, without AD [37]. Similar elevation in our MS/MS readouts emphasizes its potential use in differentiating PD from PDCI. ELISA studies in a larger cohort may provide better insights.

Human ApoAI, protein maintains cholesterol homeostasis in the CNS [38, 39]. Few in-vitro studies demonstrate a direct interaction between ApoA-I and APP in inhibiting A $\beta$  plaque

formation [40, 41]. Lower levels of ApoA-I in the plasma, was a potent risk factor for cognitive decline in MCI. A similar reduction in plasma/serum correlated well with severity of symptoms in AD [42, 43]. CSF collected at autopsy from AD cases too showed low levels [44]. The sizeable differences in its levels between our PDCI and NPH cases make it an interesting candidate. ApoA-IV is synthesized in limited amounts in the hypothalamus [45]. Although unaltered in an independent capacity it may still influence the pathogenesis as seen from the enhanced ratio of ApoA-I:ApoA-IV. Thus positive correlation between 1) CFAH and ApoA-I:ApoA-IV ratio with digit vigilance as well as ANT percentiles respectively 2) negative correlation between fibrinogen and verbal N-BACK along with WCST as well as 3) ApoA-IV levels and verbal N-BACK confirm their role in cognition-related pathology in PDCI.

Gene ontology studies in neurodegenerative disorders revealed that impaired protein degradation leads to abnormal aggregation of misfolded proteins like amyloid- $\beta$  and  $\alpha$ -synuclein, which may be subsequently transferred by exosomes. The proteins viz. *FGG*, *FGB*, *FGA*, *SERPING1*, *SERPINA3*, *CNDP1*, *CPE*, *SCG3* etc. are associated with protein metabolism. The alterations in immune response proteins of the complement system and regulators like CFAH, clusterin and orosomucoid reflect compromised immune function. Exosomes being vesicles for intracellular transfer of cargos, the alterations in exosomal proteins (*FGG*; *FGB*; *FGA*; *GSN*; *CFH*; *HRG*; *VTN*; *CLU*; *APOA-II*; *APOA-I*; *AHSG*; *SERPING1*; *SERPINA3*; *THY1*; *HP*; *HBB*) affects protein logistics. Interestingly certain proteins modulate both protein metabolism as well as exosome related processes viz. (*FGG*; *FGB*; *FGA*, *SERPING1* *SERPINA3*).

The exclusive downregulation of proteins like CNDP-1, DKK3, CPE and SCG3 precursor in PDCI, deserve detailed analysis. CNDP1 is an isoform of carnosinase that catalyzes the hydrolysis of dipeptides carnosine ( $\beta$ -alanyl-l-histidine) and homocarnosine ( $\gamma$ -aminobutyryl-l-

histidine). Apart from amyloid- $\beta$ , t-tau and p-tau, a decrease in CNDP1 was identified as a CSF biomarker for early-stage AD [46] and may serve similar a purpose in PDCI in our study. Exopeptidases like CPE/NF $\alpha$ 1 and SCG3 are secretory sorting receptors that activate peptide messengers; target them at regulated secretory pathway yet get aggregated in senile plaques of AD patients and transgenic mice [47]. Hence, the down-regulation of *CPE* in our samples implies hints at possible aggregation. Dkk3 is a divergent glycoprotein co-expressed with amyloid- $\beta$  peptide in plaques of AD patients [48]. It is enhanced in AD, DLB, and FTD. The mild reduction in our study suggests that A $\beta$  plaques may not be involved in the pathogenesis of cognitive impairment in PD.

PD was associated with interesting proteins like *APP*, *NPTXR*, *CHI-3-L 1* and *SCG2*. *APP* binds to the death receptor DR6 via caspase [49] and its upregulation suggests axonal degeneration and neuronal death. *NPTXR*, [50] a transmembrane synaptic protein, is decreased in CSF of AD patients with severe cognitive impairment [51], hence the higher levels in our samples confirm normal cognition in PD. The significant down-regulation in *SCG3* in PDCI contrasted by an increase in *SCG2* in PD supports the hypothesis of catecholaminergic deficit in the later stages of PD [52, 53]; which is often riddled with cognitive impairment. *CHI3-L1* being associated with neuroinflammation [54] and faster cognitive decline, its increase in PD-CSF hints at the likely progress into cognitive impairment.

Although our primary aim was to identify biomarkers for PDCI, we serendipitously found higher fibrinogen levels in NPH, which tempts us to propose its likely contribution in the disease pathology. Other proteins of significance include ceruloplasmin, *IGFBP7*, *SERPINA1*, *VGF*-nerve growth factor, *NRCAM-L1* etc. Ceruloplasmin being an acute phase copper binding protein that lowers iron induced oxidative damage [55]; its mild reduction in NPH-CSF suggests iron

deposition in the brain. Upregulation of *IGFBP7* in the hippocampus of AD mouse is associated with cognitive decline [56]; and partly explains the signs of cognitive deficits in our NPH patients. *Serpina1* is an anti-inflammatory protein of the choroid plexus, the reduction of which may have inflammatory consequences [29, 57]. Similar is the case with low VGF-nerve growth factor levels. Truncation of *NRCAM-L1* leads to hydrocephalus [58], hence its lower levels in our study may be a predictor of NPH, yet its pathogenic potential needs to be studied in detail. Although the sample size is small and is the limiting factor of our study, it provides convincing leads. Further, a study on a larger cohort and examination of plasma/serum would be essential to derive confirmatory answers.

## **Conclusion**

Our study suggests that *FGA* may be a better marker to distinguish PDCI from NPH. In view of the correlation between the digit-vigilance and N-BACK tests with CFAH and ApoA-IV levels respectively, these proteins may be useful in predicting cognitive impairment in PDCI and NPH. Since most proteins identified originate in the periphery, determining their levels in blood/serum may provide non-invasive avenues. Further validation in a larger cohort is essential to confirm the battery of proteins that can serve as biomarkers for PDCI. Thus, our non-targeted approach has provided essential clues for biomarker identification. Further studies using these proteins in animal models may assist the understanding of pathogenic trajectory of cognitive decline in PD.

## **References**

1. Peterson RC, Stevens JC, Ganguli M, Tangalos EG, Cummings JL, Dekosky ST. Early detection of dementia: Mild cognitive impairment (an evidence-based review). Report of the Quality Standards Subcommittee of the American Academy of Neurology. *Neurology*. 2001;56:1133-42.
2. Weil RS, Costantini AA, Schrag AE. Mild cognitive impairment in Parkinson's disease—what is it?. *Current neurology and neuroscience reports*. 2018 Apr;18(4):1-1.

3. Hely MA, Reid WG, Adena MA, Halliday GM, Morris JG. The Sydney multicenter study of Parkinson's disease: the inevitability of dementia at 20 years. *Movement disorders*. 2008 Apr 30;23(6):837-44.
4. Sanyal J, Banerjee TK, Rao VR. Dementia and cognitive impairment in patients with Parkinson's disease from India: a 7-year prospective study. *American Journal of Alzheimer's Disease & Other Dementias®*. 2014 Nov;29(7):630-6.
5. Emre M, Aarsland D, Brown R, Burn DJ, Duyckaerts C, Mizuno Y, Broe GA, Cummings J, Dickson DW, Gauthier S, Goldman J. Clinical diagnostic criteria for dementia associated with Parkinson's disease. *Movement disorders: official journal of the Movement Disorder Society*. 2007 Sep 15;22(12):1689-707.
6. Mattila PM, Rinne JO, Helenius H, Dickson DW, R ytt  M. Alpha-synuclein-immunoreactive cortical Lewy bodies are associated with cognitive impairment in Parkinson's disease. *Acta neuropathologica*. 2000 Jul 1;100(3):285-90.
7. Kehagia AA, Barker RA, Robbins TW. Cognitive impairment in Parkinson's disease: the dual syndrome hypothesis. *Neurodegenerative diseases*. 2013;11(2):79-92.
8. Robbins TW, Cools R. Cognitive deficits in Parkinson's disease: a cognitive neuroscience perspective. *Movement Disorders*. 2014 Apr 15;29(5):597-607.
9. Saito M, Nishio Y, Kanno S, Uchiyama M, Hayashi A, Takagi M, Kikuchi H, Yamasaki H, Shimomura T, Iizuka O, Mori E. Cognitive profile of idiopathic normal pressure hydrocephalus. *Dementia and geriatric cognitive disorders extra*. 2011;1(1):202-11.
10. Abdi F, Quinn JF, Jankovic J, McIntosh M, Leverenz JB, Peskind E, Nixon R, Nutt J, Chung K, Zabetian C, Samii A. Detection of biomarkers with a multiplex quantitative proteomic platform in cerebrospinal fluid of patients with neurodegenerative disorders. *Journal of Alzheimer's Disease*. 2006 Jan 1;9(3):293-348.
11. Compta Y, Valente T, Saura J, Segura B, Iranzo A, Serradell M, Junqu  C, Tolosa E, Valldeoriola F, Munoz E, Santamaria J. Correlates of cerebrospinal fluid levels of oligomeric-and total- $\alpha$ -synuclein in premotor, motor and dementia stages of Parkinson's disease. *Journal of neurology*. 2015 Feb;262(2):294-306.
12. Hall S,  hrfelt A, Constantinescu R, Andreasson U, Surova Y, Bostrom F, Nilsson C, Widner H, Decraemer H, N gga K, Minthon L. Accuracy of a panel of 5 cerebrospinal fluid biomarkers in the differential diagnosis of patients with dementia and/or parkinsonian disorders. *Archives of neurology*. 2012 Nov 1;69(11):1445-52.
13.  hrfelt A, Grognet P, Andreasen N, Wallin A, Vanmechelen E, Blennow K, Zetterberg H. Cerebrospinal fluid  $\alpha$ -synuclein in neurodegenerative disorders—a marker of synapse loss?. *Neuroscience letters*. 2009 Feb 6;450(3):332-5.
14. Ishikawa M, Hashimoto M, Kuwana N, Mori E, Miyake H, Wachi A, Takeuchi T, Kazui H, Koyama H. Guidelines for Management of Idiopathic Normal Pressure Hydrocephalus Guidelines From the Guidelines Committee of Idiopathic Normal Pressure Hydrocephalus, the Japanese Society of Normal Pressure Hydrocephalus. *Neurologia medico-chirurgica*. 2008;48(Supplement):S1-23.
15. Rao Shobhini, Subbakrishna D.K., Gopukumar K. NIMHANS Neuropsychology battery-2004 manual
16. Heaton RK, Grant I, Butters N, White DA, Kirson D, Atkinson JH, McCutchan JA, Taylor MJ, Kelly MD, Ellis RJ, Wolfson T. The HNRC 500-Neuropsychology of HIV infection at different disease stages. *Journal of the International Neuropsychological Society*. 1995 May;1(3):231-51.
17. Litvan I, Goldman JG, Tr ster AI, Schmand BA, Weintraub D, Petersen RC, Mollenhauer B, Adler CH, Marder K, Williams Gray CH, Aarsland D. Diagnostic criteria for mild cognitive impairment in Parkinson's disease: Movement Disorder Society Task Force guidelines. *Movement disorders*. 2012 Mar;27(3):349-56.
18. Beri D, Yadav P, Devi HR, Narayana C, Gadara D, Tatu U. Demonstration and Characterization of Cyst-Like Structures in the Life Cycle of *Trichomonas vaginalis*. *Frontiers in cellular and infection microbiology*. 2020 Jan 14;9:430.

19. Tyanova S, Temu T, Cox J. The MaxQuant computational platform for mass spectrometry-based shotgun proteomics. *Nature protocols*. 2016 Dec;11(12):2301.
20. Pathan M, Keerthikumar S, Ang CS, Gangoda L, Quek CY, Williamson NA, Mouradov D, Sieber OM, Simpson RJ, Salim A, Bacic A. FunRich: An open access standalone functional enrichment and interaction network analysis tool. *Proteomics*. 2015 Aug;15(15):2597-601.
21. Schwarz ST, Afzal M, Morgan PS, Bajaj N, Gowland PA, Auer DP. The 'swallow tail' appearance of the healthy nigrosome—a new accurate test of Parkinson's disease: a case-control and retrospective cross-sectional MRI study at 3T. *PloS one*. 2014 Apr 7;9(4):e93814.
22. Watson GS, Leverenz JB. Profile of cognitive impairment in Parkinson's disease. *Brain Pathology*. 2010 May;20(3):640-5.
23. Molde K, Söderström L, Laurell K. Parkinsonian symptoms in normal pressure hydrocephalus: a population-based study. *Journal of neurology*. 2017 Oct;264(10):2141-8.
24. Braak H, Rüb U, Steur EJ, Del Tredici K, De Vos RA. Cognitive status correlates with neuropathologic stage in Parkinson disease. *Neurology*. 2005 Apr 26;64(8):1404-10.
25. Kotzbauer PT, Cairns NJ, Campbell MC, Willis AW, Racette BA, Tabbal SD, Perlmutter JS. Pathologic accumulation of  $\alpha$ -synuclein and A $\beta$  in Parkinson disease patients with dementia. *Archives of neurology*. 2012 Oct 1;69(10):1326-31.
26. Stewart T, Liu C, Ghingina C, Cain KC, Auinger P, Cholerton B, Shi M, Zhang J, Parkinson Study Group DATATOP Investigators. Cerebrospinal fluid  $\alpha$ -synuclein predicts cognitive decline in Parkinson disease progression in the DATATOP cohort. *The American journal of pathology*. 2014 Apr 1;184(4):966-75.
27. Lehnert S, Jesse S, Rist W, Steinacker P, Soininen H, Herukka SK, Tumani H, Lenter M, Oeckl P, Ferger B, Hengerer B. iTRAQ and multiple reaction monitoring as proteomic tools for biomarker search in cerebrospinal fluid of patients with Parkinson's disease dementia. *Experimental neurology*. 2012 Apr 1;234(2):499-505.
28. Yin GN, Lee HW, Cho JY, Suk K. Neuronal pentraxin receptor in cerebrospinal fluid as a potential biomarker for neurodegenerative diseases. *Brain research*. 2009 Apr 10;1265:158-70.
29. Jesse S, Lehnert S, Jahn O, Parnetti L, Soininen H, Herukka SK, Steinacker P, Tawfik S, Tumani H, Von Arnim CA, Neumann M. Differential sialylation of serpin A1 in the early diagnosis of Parkinson's disease dementia. *PLoS One*. 2012 Nov 8;7(11):e48783.
30. Tennent GA, Brennan SO, Stangou AJ, O'Grady J, Hawkins PN, Pepys MB. Human plasma fibrinogen is synthesized in the liver. *Blood*. 2007 Mar 1;109(5):1971-4.
31. Weisel JW. Fibrinogen and fibrin. *Advances in protein chemistry*. 2005 Jan 1;70:247-99.
32. Golanov EV, Sharpe MA, Regnier-Golanov AS, Del Zoppo GJ, Baskin DS, Britz GW. Fibrinogen chains intrinsic to the brain. *Frontiers in neuroscience*. 2019 May 29;13:541.
33. Marfà S, Jimenez W. Fibrinogen  $\alpha$ -Chain as a Serum Marker of Liver Disease. *Biomarkers in Liver Disease*. 2017:493.
34. Carro E. Gelsolin as therapeutic target in Alzheimer's disease. *Expert opinion on therapeutic targets*. 2010 Jun 1;14(6):585-92.
35. Gordon DL, Kaufman RM, Blackmore TK, Kwong J, Lublin DM. Identification of complement regulatory domains in human factor H. *The Journal of Immunology*. 1995 Jul 1;155(1):348-56.
36. Wang Y, Hancock AM, Bradner J, Chung KA, Quinn JF, Peskind ER, Galasko D, Jankovic J, Zabetian CP, Kim HM, Leverenz JB. Complement 3 and factor h in human cerebrospinal fluid in Parkinson's disease, Alzheimer's disease, and multiple-system atrophy. *The American journal of pathology*. 2011 Apr 1;178(4):1509-16.
37. Nguyen T, Watts K, Lah J, Glass J, Levey A, Hu W. Complement Factor H is a Biomarker for Mild Cognitive Impairment Not Due to Alzheimer's Disease. 2014 (S38. 009).
38. Dietschy JM, Turley SD. Cholesterol metabolism in the brain. *Current opinion in lipidology*. 2001 Apr 1;12(2):105-12.
39. Roheim PS, Carey M, Forte T, Vega GL. Apolipoproteins in human cerebrospinal fluid. *Proceedings of the National Academy of Sciences*. 1979 Sep 1;76(9):4646-9.



40. Koldamova RP, Lefterov IM, Lefterova MI, Lazo JS. Apolipoprotein AI directly interacts with amyloid precursor protein and inhibits A $\beta$  aggregation and toxicity. *Biochemistry*. 2001 Mar 27;40(12):3553-60.
41. Paula-Lima AC, Tricerri MA, Brito-Moreira J, Bomfim TR, Oliveira FF, Magdesian MH, Grinberg LT, Panizzutti R, Ferreira ST. Human apolipoprotein A-I binds amyloid- $\beta$  and prevents A $\beta$ -induced neurotoxicity. *The international journal of biochemistry & cell biology*. 2009 Jun 1;41(6):1361-70.
42. Liu HC, Hu CJ, Chang JG, Sung SM, Lee LS, Yuan RY, Leu SJ. Proteomic identification of lower apolipoprotein AI in Alzheimer's disease. *Dementia and geriatric cognitive disorders*. 2006;21(3):155-61.
43. Kawano M, Kawakami M, Otsuka M, Yashima H, Yaginuma T, Ueki A. Marked decrease of plasma apolipoprotein AI and AII in Japanese patients with late-onset non-familial Alzheimer's disease. *Clinica chimica acta; international journal of clinical chemistry*. 1995 Aug 1;239(2):209-11.
44. Roher AE, Maarouf CL, Sue LI, Hu Y, Wilson J, Beach TG. Proteomics-derived cerebrospinal fluid markers of autopsy-confirmed Alzheimer's disease. *Biomarkers*. 2009 Nov 1;14(7):493-501.
45. Liu M, Shen L, Liu Y, Tajima D, Sakai R, Woods SC, Tso P. Diurnal rhythm of apolipoprotein A-IV in rat hypothalamus and its relation to food intake and corticosterone. *Endocrinology*. 2004 Jul 1;145(7):3232-8.
46. Hu Y, Hosseini A, Kauwe JS, Gross J, Cairns NJ, Goate AM, Fagan AM, Townsend RR, Holtzman DM. Identification and validation of novel CSF biomarkers for early stages of Alzheimer's disease. *PROTEOMICS—Clinical Applications*. 2007 Nov;1(11):1373-84.
47. PláV, Paco S, Ghezali G, Ciria V, Pozas E, Ferrer I, Aguado F. Secretory Sorting Receptors Carboxypeptidase E and Secretogranin III in Amyloid  $\beta$  Associated Neural Degeneration in Alzheimer's Disease. *Brain Pathology*. 2013 May;23(3):274-84.
48. Bruggink KA, Kuiperij HB, Gloerich J, Otte-Höller I, Rozemuller AJ, Claassen JA, Küsters B, Verbeek MM. Dickkopf-related protein 3 is a potential A $\beta$ -associated protein in Alzheimer's Disease. *Journal of neurochemistry*. 2015 Sep;134(6):1152-62.
49. Nikolaev A, McLaughlin T, O'Leary DD, Tessier-Lavigne M. APP binds DR6 to trigger axon pruning and neuron death via distinct caspases. *Nature*. 2009 Feb;457(7232):981-9.
50. D'Nette CD, Omeis IA, Cushman SJ, Helms JA, Perin MS. Neuronal pentraxin receptor, a novel putative integral membrane pentraxin that interacts with neuronal pentraxin 1 and 2 and taipoxin-associated calcium-binding protein 49. *Journal of Biological Chemistry*. 1997 Aug 22;272(34):21488-94.
51. Wildsmith KR, Schauer SP, Smith AM, Arnott D, Zhu Y, Haznedar J, Kaur S, Mathews WR, Honigberg LA. Identification of longitudinally dynamic biomarkers in Alzheimer's disease cerebrospinal fluid by targeted proteomics. *Molecular neurodegeneration*. 2014 Dec;9(1):1-4.
52. BartolomucciA, Possenti R, Mahata SK, Fischer-Colbrie R, Loh YP, Salton SR. The extended granin family: structure, function, and biomedical implications. *Endocrine reviews*. 2011 Dec 1;32(6):755-97.
53. Rotunno MS, Lane M, Zhang W, Wolf P, Oliva P, Viel C, Wills AM, Alcalay RN, Scherzer CR, Shihabuddin LS, Zhang K. Cerebrospinal fluid proteomics implicates the granin family in Parkinson's disease. *Scientific reports*. 2020 Feb 12;10(1):1-1.
54. Johansen JS, Jensen BV, Roslind A, Nielsen D, Price PA. Serum YKL-40, a new prognostic biomarker in cancer patients?. *Cancer Epidemiology and Prevention Biomarkers*. 2006 Feb 1;15(2):194-202.
55. Harris ZL, Durley AP, Man TK, Gitlin JD. Targeted gene disruption reveals an essential role for ceruloplasmin in cellular iron efflux. *Proceedings of the National Academy of Sciences*. 1999 Sep 14;96(19):10812-7.
56. Agbemenyah HY, Agis-Balboa RC, Burkhardt S, Delalle I, Fischer A. Insulin growth factor binding protein 7 is a novel target to treat dementia. *Neurobiology of disease*. 2014 Feb 1;62:135-43.

57. Wormser U, Mandrioli J, Vinceti M, Fini N, Sintov A, Brodsky B, Proskura E, Finkelstein Y. Reduced levels of alpha-1-antitrypsin in cerebrospinal fluid of amyotrophic lateral sclerosis patients: a novel approach for a potential treatment. *Journal of neuroinflammation*. 2016 Dec;13(1):1-5.
58. Fields RD. Cell adhesion molecules: Implications for neurological disease. *The Neuroscientist*. 1998 Jan;4(1):4-8.
59. L.F D'Elia, P Satz, C.L Uchiyama, T White Color Trails Test. Professional manual, Psychological Assessment Resources, Odessa, FL (1996)
60. Benton, A. I., & Hamsher, K. (1989). *Multilingual Aphasia Examination*. Iowa City, IA: AJA Associates
61. Smith, E. E., & Jonides, J. (1999). Storage and executive processes in the frontal lobes. *Science*, 283(5408), 1657–1661.
62. Lewis RF, Rennick PM. *Manual for the repeatable cognitive-perceptual-motor battery*. Clinton Township, MI: Axon. 1979.
63. Maj M, D'Elia L, Satz, P, Janssen R Evaluation of two neuropsychological tests designed to minimize cultural bias in the assessment of HIV-1 seropositive persons: A WHO study. *Archives of Clinical Neuropsychology* 1994; 8: 123-135
64. Shallice T. Specific impairments of planning. *Philosophical Transactions of the Royal Society of London. B, Biological Sciences*. 1982 Jun 25;298(1089):199-209.
65. Milner B. Effects of different brain lesions on card sorting: The role of the frontal lobes. *Archives of neurology*. 1963 Jul 1;9(1):90-100.
66. Rey, A. (1941). L'examen psychologique dans les cas d'encephalopathie traumatique [Psychological examination of traumatic encephalopathy]. *Arch. Psychol.* 28, 286–340.

## Legends:

**Fig. 1:** Histogram representing percentage of patients showing impairment in cognitive domains viz. attention, language, learning, executive and visuospatial domains. Number of subjects/patients enrolled NNC = 11; PDCI = 10; PD = 6, NPH = 10. Note that 88 % PDCI patients showed impairment in attention; 63% in language and learning; 50% in both executive and visuospatial function. A higher number (83%) of NPH patients showed impairment in learning. Among the PD patients 17 % showed impairment in attention, learning & visuospatial domains. NNC also showed higher (42%) impairment in visuospatial domain.

**Fig. 2:** Histogram depicting individual values for ELISA-based estimation of  $\alpha$ -synuclein in CSF of NNC (n=6), PD (n=6), PDCI (n=9) & NPH (n=10). Note mild, non-significant, decrease in its levels in PDCI-CSF [PDCI vs. NNC  $p=0.0762$ ; PDCI vs. PD;  $p=0.8735$ ; PDCI vs. NPH  $p=0.1735$ ].

**Fig 3:** Heat map showing hierarchical expression of LFQ intensities depicting altered protein expression in PDCI, NPH & PD. (A) Of the 282 identified proteins 42 proteins were differentially altered. (B) Venn diagram showing 9, 4 and 6 proteins being uniquely altered in PDCI, PD and NPH respectively, whereas 7 proteins overlapped in PDCI and NPH. (C) Table showing the list of unique and common proteins with altered expression in PD, PDCI and NPH.

**Fig 4:** Volcano plots showing fold changes in LFQ intensities (A) PDCI vs NNC. (B) NPH vs NNC (C) PD vs NNC. Ordinate represents log p-values, and the abscissa represents the log fold changes. Significantly down-regulated proteins are highlighted in green (left quadrant) whereas

significantly upregulated proteins highlighted in red (right quadrant). Proteins highlighted in blue were chosen for validation by ELISA. **Note:** Names of genes (italicized) and proteins have been used interchangeably.

**Fig. 5:** Histogram with individual values representing ELISA-derived protein concentrations in patient CSF. A. Note the significantly high fibrinogen levels in NPH (NNC vs NPH \*\* $p = 0.0032$ ). B. Note the significantly higher level of gelsolin in PD (NNC vs PD \* $p = 0.0109$ ) and lower level in PDCI (PD vs PDCI \* $p = 0.0368$ ). C & D: No significant difference was observed in CFAH and ApoA-IV respectively. Note the mildly high CFAH in PDCI (PDCI vs. PD,  $p = 0.1030$ ) E. ApoA-I is significantly more in NNC vs NPH \* $p = 0.0287$ , PD vs NPH \*\* $p = 0.0012$ , PDCI vs NPH \* $p = 0.0395$ . F. The ratio of ApoA-I: ApoA-IV was significantly higher in NPH (PDCI vs NPH \* $p = 0.0456$ ).

**Fig. 6:** Pie charts representing the gene ontology-based percentage of altered proteins identified by the FunRich software in the different study groups.

**Fig. 6a:** PDCI

A. Biological processes B. Molecular functions C. Cellular components. 6 entities were chosen for each category in the pie chart display. Out of 28 gene products 25 were mapped.

**Fig. 6b:** PD

A. Biological processes B. Molecular functions C. Cellular components. 7 biological processes are represented in A. whereas B. & C. present 6 molecular functions and cellular components.

**Fig. 6c:** NPH

A. Biological processes B. Molecular functions C. Cellular components. 6 entities were chosen for each category in the pie chart display.

**Fig: 1**

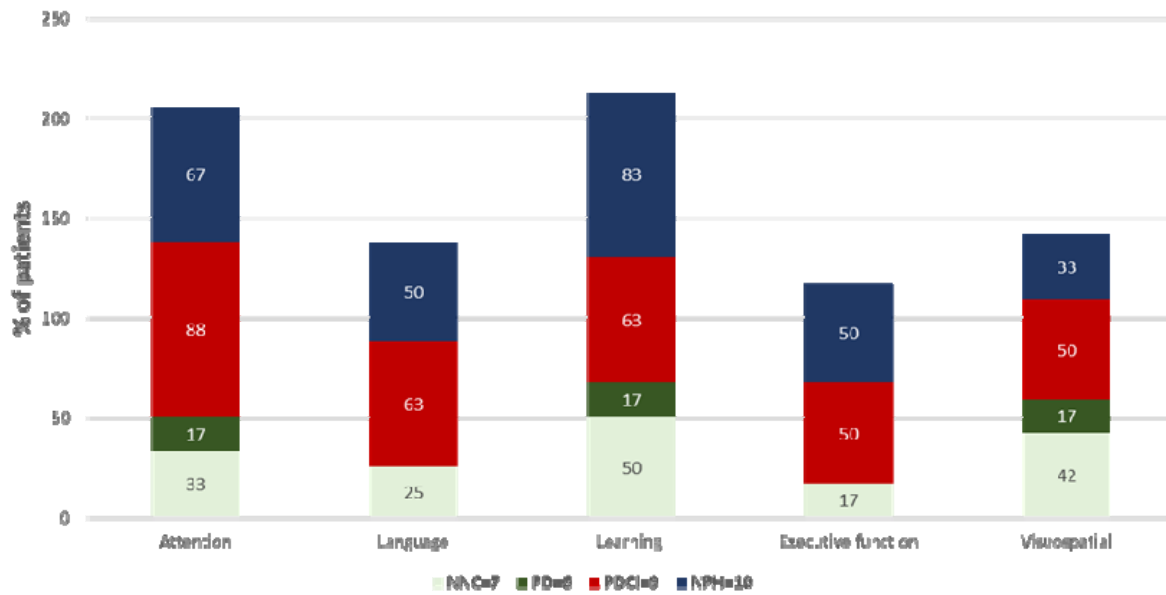

**Fig 2:**

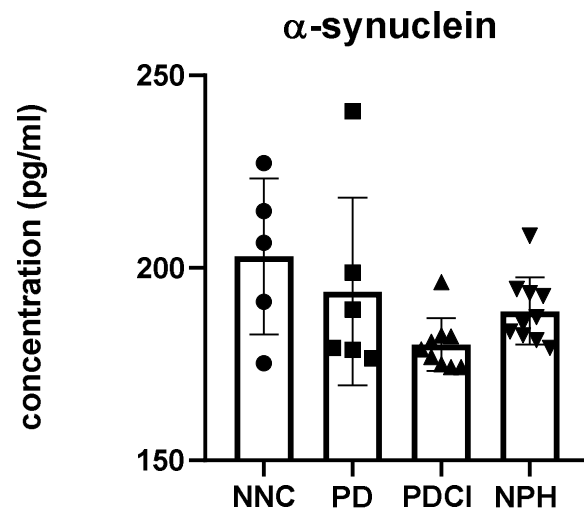

**Fig 3:**

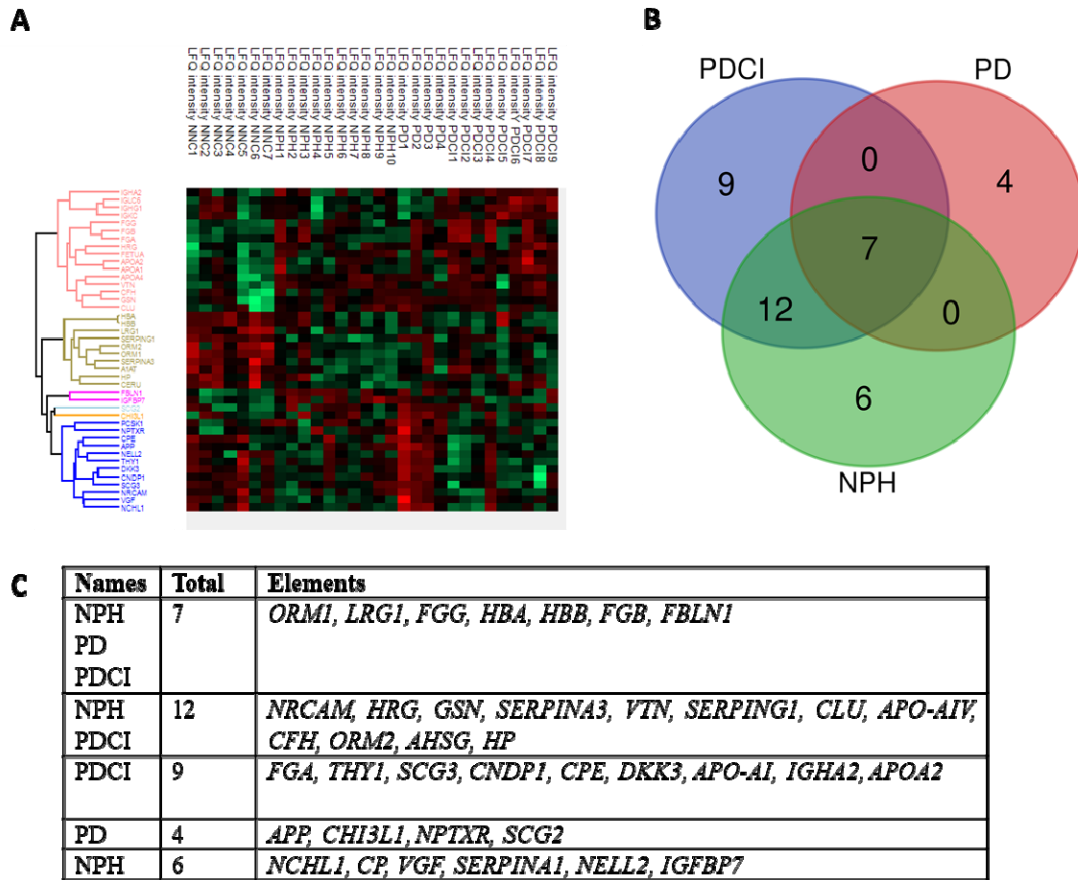

Fig 4:

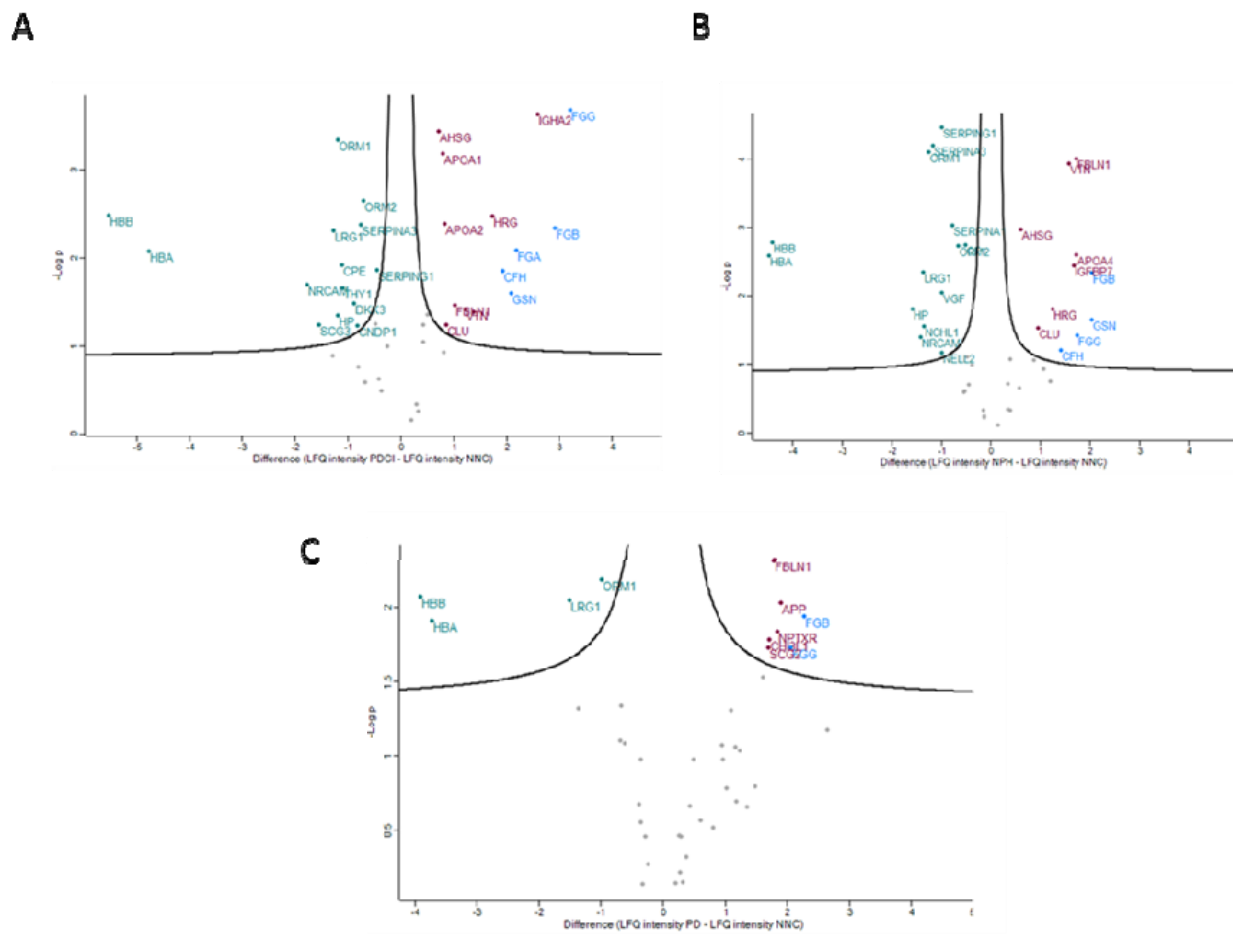



**Fig: 5**

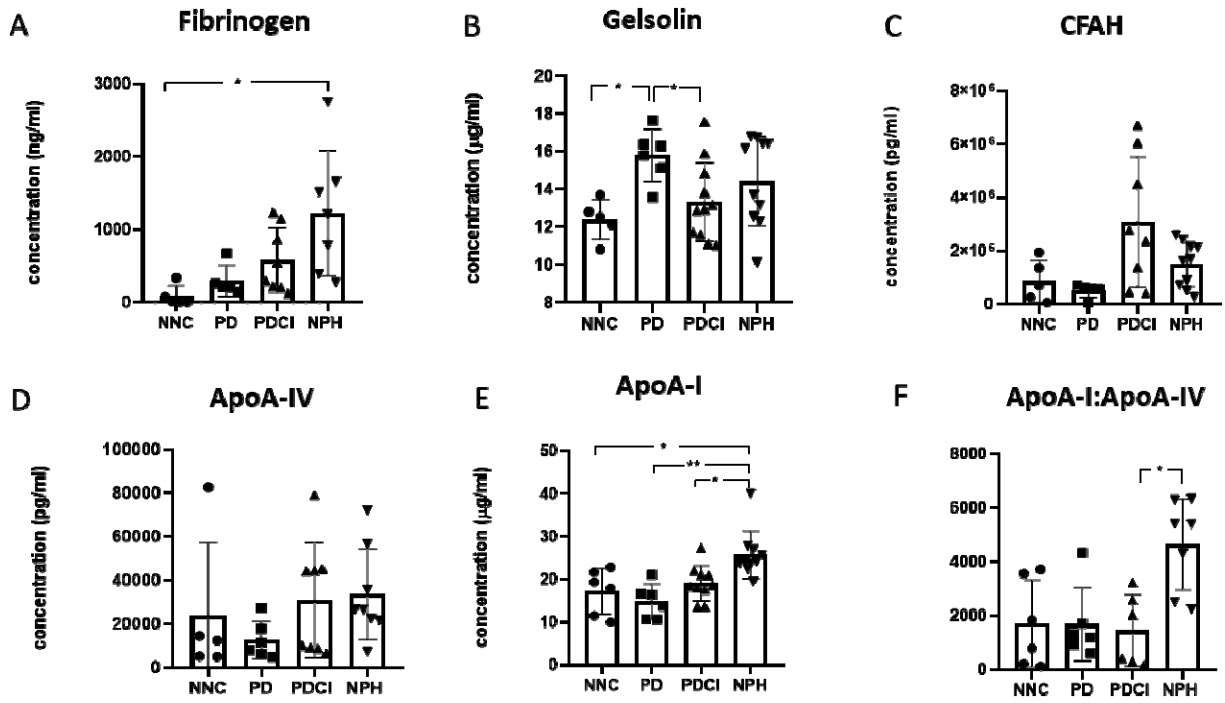

Fig 6a: PDCI

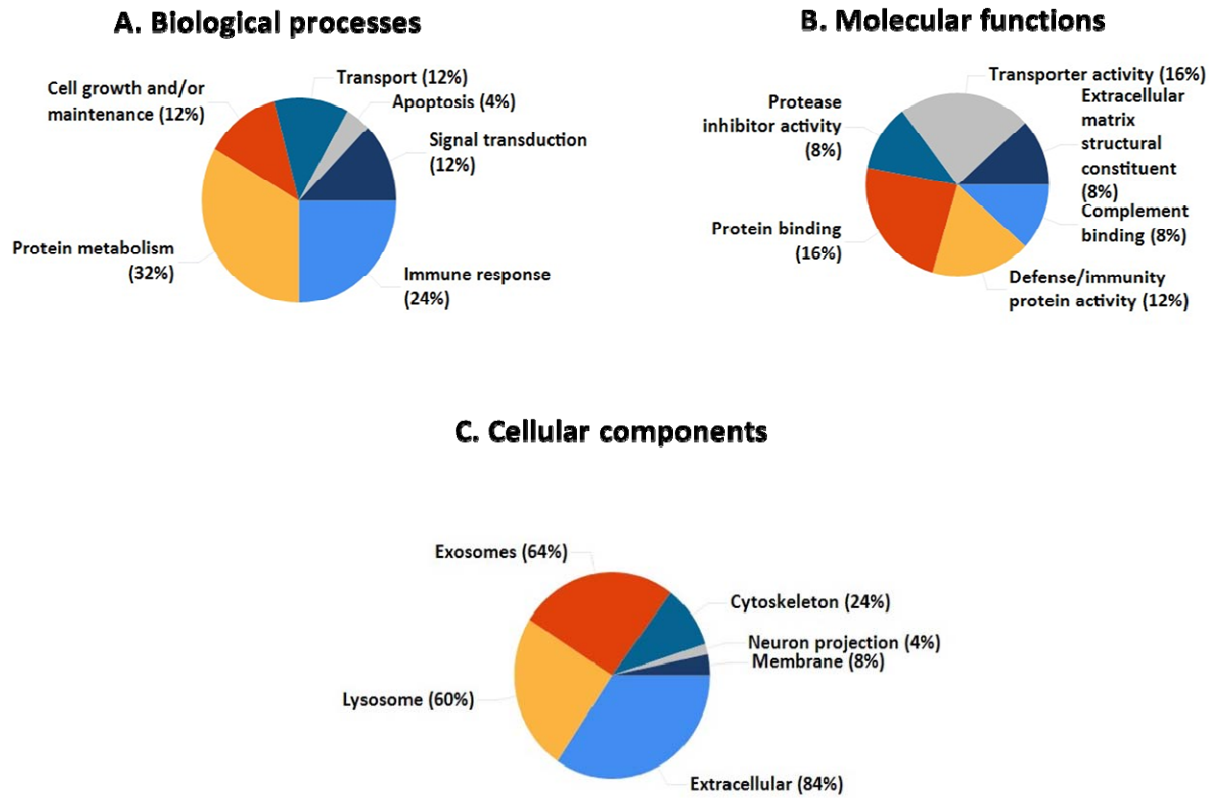

**Fig 6b: PD**

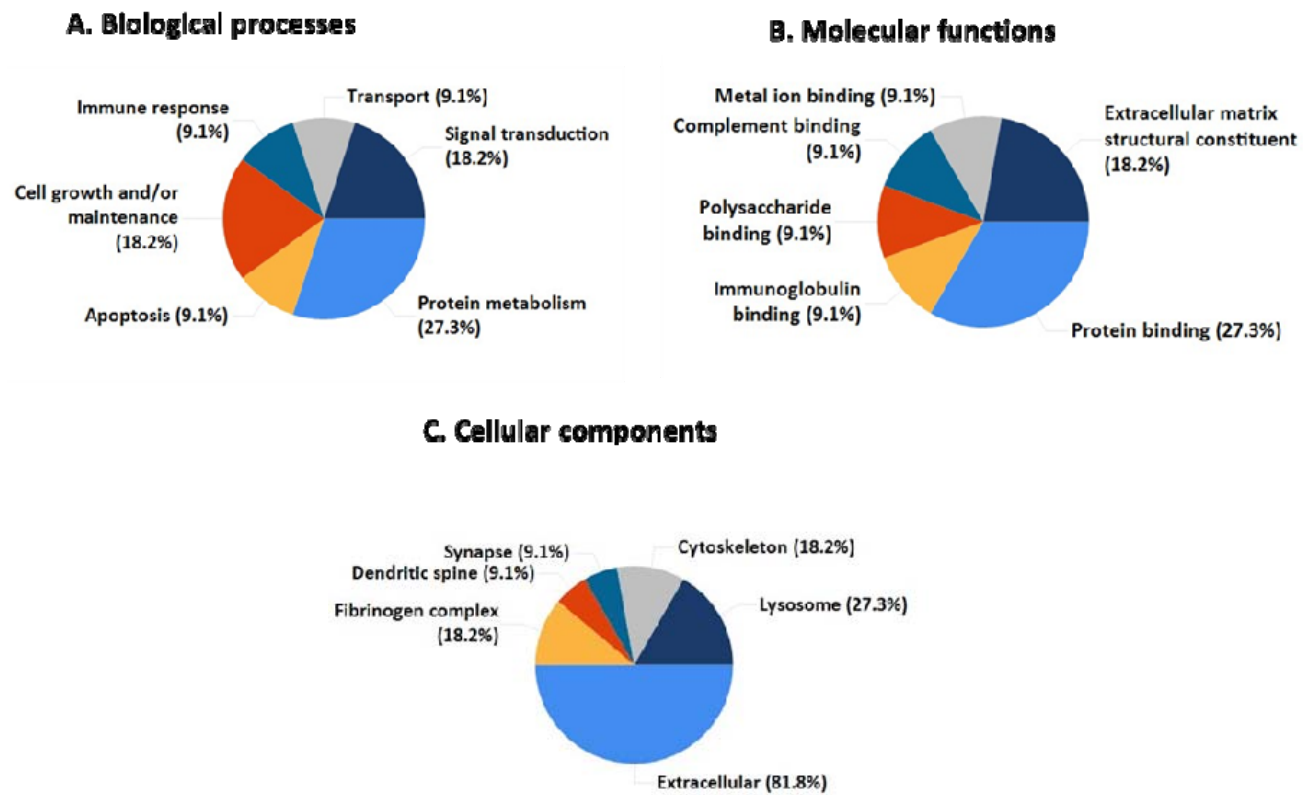

**Fig 6c: NPH**

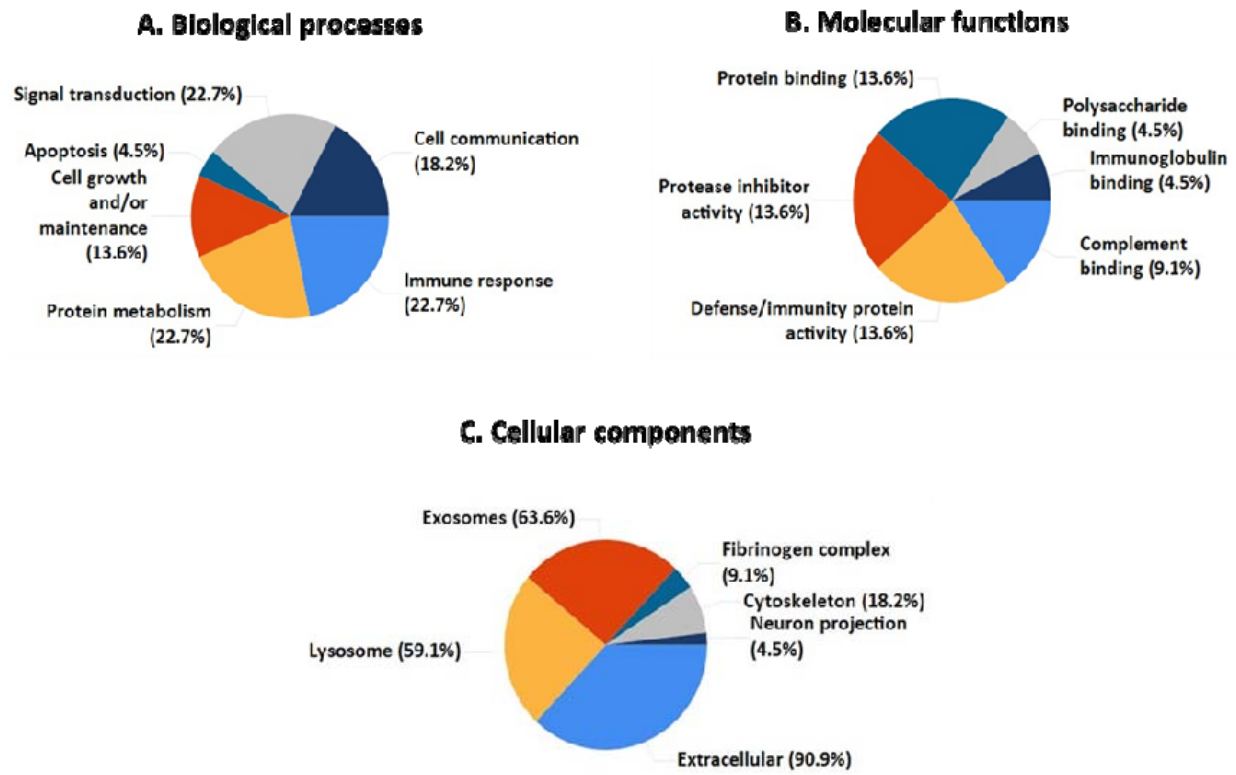

**Table 1: Demographic details of the patients enrolled in the study.**

| <b>Characteristics</b>                 | <b>NNC</b>    | <b>PD</b>            | <b>PDCI</b>      | <b>NPH</b>     |
|----------------------------------------|---------------|----------------------|------------------|----------------|
| <b>Total No. of subjects/ patients</b> | 13            | 6                    | 11               | 12             |
| <b>Sex</b>                             | M=9, F=4      | M=5, F=1             | M=11, F=0        | M=11, F=1      |
| <b>Median age (Years)</b>              | 54<br>(45-71) | 60<br>(53-67)        | 65<br>(52-73)    | 62<br>(50-73)  |
| <b>Mean disease duration (Years)</b>   | NA            | 6                    | 3                | 4              |
| <b>Median MOCA score</b>               | 22<br>(18-28) | 24.5<br>(24-28)      | 20<br>(8-24)     | 19.5<br>(7-30) |
| <b>Median UPDRS score 'ON' state</b>   | NA            | 25.25<br>(12.5-26.5) | 41.5<br>(16-64)  | NA             |
| <b>Median UPDRS score 'OFF' state</b>  | NA            | 30<br>(18-41)        | 47.25<br>(37-77) | 14.5<br>(5-44) |

**Table 2:** Neuropsychological tests studied under each domain

| <b>Domains</b> |                         |                                                             |                                                                      |                                                                    |                                                                                                                                                                  |
|----------------|-------------------------|-------------------------------------------------------------|----------------------------------------------------------------------|--------------------------------------------------------------------|------------------------------------------------------------------------------------------------------------------------------------------------------------------|
| <b>Tests</b>   | <b>Attention</b>        | <b>Language<br/>(Verbal &amp;<br/>semantic<br/>fluency)</b> | <b>Working<br/>memory and<br/>verbal<br/>learning and<br/>memory</b> | <b>Executive</b>                                                   | <b>Visual memory<br/>Copy trial- visuo-<br/>spatial<br/>constructive<br/>ability<br/>Immediate recall<br/>(IR) and delayed<br/>recall (DR) visual<br/>memory</b> |
|                | Color trails<br>[58]    | Controlled Oral<br>Word<br>Association Test<br>(COWA) [60]  | Verbal N-<br>BACK<br>[61]                                            | Tower of<br>London<br>(TOL)<br>[63]                                | Complex Figure<br>Test (CFT)<br>[65]                                                                                                                             |
|                | Digit vigilance<br>[59] | Animal Naming<br>Test (ANT)                                 | Auditory<br>Verbal<br>Learning Test<br>(AVLT) [62]                   | Wisconsin<br>Card Sorting<br>Test<br>(WCST)<br>[64]<br>Stroop test |                                                                                                                                                                  |

**Table 3:** Altered proteins in PDCI vs NNC. Note the LFQ difference and the fold change of proteins (Log fold = LFQ difference).

| SL No. | Gene names                   | Protein names                                                  | LFQ difference | Fold change | -log (p value) |
|--------|------------------------------|----------------------------------------------------------------|----------------|-------------|----------------|
| 1      | <i>FGG</i>                   | Fibrinogen $\beta$ chain                                       | 3.206306       | 9.229844    | 3.679611       |
| 2      | <i>FGB</i>                   | Fibrinogen $\gamma$ chain                                      | 2.906603       | 7.498507    | 2.340156       |
| 3      | <i>IGHA2</i>                 | Immunoglobulin heavy constant $\alpha 2$                       | 2.588646       | 6.015339    | 3.627602       |
| 4      | <i>FGA</i>                   | Fibrinogen $\alpha$ chain                                      | 2.180321       | 4.532543    | 2.089083       |
| 5      | <i>GSN</i>                   | Gelsolin                                                       | 2.088767       | 4.253843    | 1.596505       |
| 6      | <i>CFH</i>                   | Complement factor H                                            | 1.920743       | 3.786179    | 1.855669       |
| 7      | <i>HRG</i>                   | Histidine-rich glycoprotein                                    | 1.729997       | 3.317271    | 2.477776       |
| 8      | <i>APOA-IV</i>               | Apolipoprotein A4                                              | 1.374554       | 2.592878    | 1.387519       |
| 9      | <i>VTN</i>                   | Vitronectin                                                    | 1.217881       | 2.326048    | 1.420125       |
| 10     | <i>FBLN1</i>                 | Fibulin 1                                                      | 1.021255       | 2.029684    | 1.460066       |
| 11     | <i>CLU</i>                   | Clusterin                                                      | 0.861097       | 1.816419    | 1.238028       |
| 12     | <i>APOA-II</i>               | Apolipoprotein A2                                              | 0.829822       | 1.777466    | 2.390923       |
| 13     | <i>APOA-I</i>                | Apolipoprotein A1                                              | 0.792492       | 1.732064    | 3.18239        |
| 14     | <i>AHSG</i>                  | Fetuin-A                                                       | 0.715055       | 1.641546    | 3.441942       |
| 15     | <i>SERPING1</i>              | C1- inhibitor                                                  | -0.45606       | 0.728973    | 1.86647        |
| 16     | <i>ORM2</i>                  | Alpha-1-acid glycoprotein 2 precursor                          | -0.71635       | 0.608635    | 2.646635       |
| 17     | <i>SERPINA3</i>              | Alpha-1-antichymotrypsin                                       | -0.76075       | 0.590189    | 2.381479       |
| 18     | <i>CNDP1</i>                 | Carnosine Dipeptidase 1                                        | -0.81652       | 0.567808    | 1.231069       |
| 19     | <i>DKK3</i>                  | Dickkopf 3                                                     | -0.88738       | 0.540594    | 1.486255       |
| 20     | <i>THY1</i>                  | Thy-1 membrane glycoprotein                                    | -1.09575       | 0.467892    | 1.661783       |
| 21     | <i>CPE</i>                   | Carboxypeptidase E (CPE)<br>Or Neurotrophic factor- $\alpha 1$ | -1.1076        | 0.464066    | 1.922986       |
| 22     | <i>Orosomucoid 1 or ORM1</i> | Alpha-1-acid glycoprotein 1 precursor                          | -1.19579       | 0.436549    | 3.336183       |
| 23     | <i>HP</i>                    | Haptoglobin                                                    | -1.1973        | 0.436089    | 1.34499        |
| 24     | <i>LRG1</i>                  | Leucine-rich alpha-2-glycoprotein                              | -1.27958       | 0.411914    | 2.305596       |
| 25     | <i>SCG3</i>                  | Secretogranin III                                              | -1.5509        | 0.341297    | 1.244947       |
| 26     | <i>NRCAM</i>                 | Neuronal cell adhesion molecule                                | -1.78338       | 0.290502    | 1.699357       |
| 27     | <i>HBA</i>                   | Haemoglobin $\alpha$ chain                                     | -4.77007       | 0.036649    | 2.074899       |
| 28     | <i>HBB</i>                   | Haemoglobin $\beta$ chain                                      | -5.52946       | 0.02165     | 2.482579       |

**Table 4:** Altered expression proteins in PD vs NNC. Note the LFQ difference and the fold change of proteins.

| SL No. | Gene names    | Protein names                         | LFQ difference | Fold change | -log (p value) |
|--------|---------------|---------------------------------------|----------------|-------------|----------------|
| 1      | <i>FGB</i>    | Fibrinogen $\beta$ chain              | 2.268839257    | 4.819352    | 1.942482       |
| 2      | <i>FGG</i>    | Fibrinogen $\gamma$ chain             | 2.054453577    | 4.153863    | 1.729726       |
| 3      | <i>APP</i>    | Amyloid precursor protein             | 1.90311483     | 3.740198    | 2.034483       |
| 4      | <i>NPTXR</i>  | Neuronal pentraxin receptor           | 1.845703568    | 3.594282    | 1.840862       |
| 5      | <i>FBLN1</i>  | Fibulin 1                             | 1.775449889    | 3.423448    | 2.321667       |
| 6      | <i>CHI3L1</i> | Chitinase-3-like protein 1            | 1.709992647    | 3.271592    | 1.78289        |
| 7      | <i>SCG2</i>   | Secretogranin-2 precursor             | 1.697182076    | 3.24267     | 1.734019       |
| 8      | <i>HRG</i>    | Histidine-rich glycoprotein           | 1.60633564     | 3.044775    | 1.534191       |
| 9      | <i>ORM1</i>   | Alpha-1-acid glycoprotein 1 precursor | -0.995535033   | 0.50155     | 2.191851       |
| 10     | <i>LRG1</i>   | Leucine-rich alpha-2-glycoprotein     | -1.507603986   | 0.351695    | 2.052224       |
| 11     | <i>HBA</i>    | Haemoglobin $\alpha$ chain            | -3.721756969   | 0.075795    | 1.911425       |
| 12     | <i>HBB</i>    | Haemoglobin $\beta$ chain             | -3.911985602   | 0.066432    | 2.072433       |



**Table 5:** Altered expression of proteins in NPH vs NNC. Note the LFQ difference and the fold change of proteins.

| SL No. | Gene names      | Protein names                                 | LFQ difference | Fold change | -log (p value) |
|--------|-----------------|-----------------------------------------------|----------------|-------------|----------------|
| 1      | <i>FGB</i>      | Fibrinogen $\beta$ chain                      | 2.034424       | 4.096592    | 2.337591       |
| 2      | <i>GSN</i>      | Gelsolin                                      | 2.032031       | 4.089801    | 1.6519         |
| 3      | <i>FGG</i>      | Fibrinogen $\gamma$ chain                     | 1.745789       | 3.353781    | 1.425847       |
| 4      | <i>FBLN1</i>    | Fibulin 1                                     | 1.73209        | 3.322087    | 4.017884       |
| 5      | <i>APOA-IV</i>  | Apolipoprotein A-IV                           | 1.728503       | 3.313838    | 2.611286       |
| 6      | <i>IGFBP7</i>   | Insulin-like growth factor-binding protein    | 1.675269       | 3.193788    | 2.447808       |
| 7      | <i>VTN</i>      | Vitronectin                                   | 1.578295       | 2.986166    | 3.937421       |
| 8      | <i>CFH</i>      | Complement Factor H                           | 1.407013       | 2.651875    | 1.211394       |
| 9      | <i>HRG</i>      | Histidine-rich glycoprotein                   | 1.239616       | 2.361356    | 1.812513       |
| 10     | <i>CLU</i>      | Clusterin                                     | 0.958206       | 1.942892    | 1.538422       |
| 11     | <i>AHSG</i>     | Fetuin A                                      | 0.59755        | 1.513144    | 2.973582       |
| 12     | <i>CP</i>       | Ceruloplasmin                                 | -0.50918       | 0.70262     | 2.754692       |
| 13     | <i>ORM2</i>     | Alpha-1-acid glycoprotein 2 precursor         | -0.66813       | 0.629323    | 2.739543       |
| 14     | <i>SERPINA1</i> | Alpha-1 antitrypsin                           | -0.78105       | 0.581944    | 3.041422       |
| 15     | <i>SERPING1</i> | C1- inhibitor                                 | -0.98824       | 0.504093    | 4.470284       |
| 16     | <i>NELL2</i>    | Neural EGFL like 2                            | -0.99017       | 0.503417    | 1.170732       |
| 17     | <i>VGF</i>      | VGF nerve growth factor                       | -0.992         | 0.50278     | 2.054869       |
| 18     | <i>SERPINA3</i> | Alpha-1-antichymotrypsin                      | -1.16581       | 0.445714    | 4.211002       |
| 19     | <i>ORM1</i>     | Alpha-1-acid glycoprotein 1 precursor         | -1.25082       | 0.420211    | 4.105446       |
| 20     | <i>NCHL1</i>    | Neural cell adhesion molecule L1 like protein | -1.35802       | 0.390118    | 1.564199       |
| 21     | <i>LRG1</i>     | Leucine-rich alpha-2-glycoprotein             | -1.36901       | 0.387157    | 2.349068       |
| 22     | <i>NRCAM</i>    | Neuronal cell adhesion molecule               | -1.41429       | 0.375195    | 1.399183       |
| 23     | <i>HP</i>       | Haptoglobin                                   | -1.58972       | 0.332236    | 1.815579       |
| 24     | <i>HBB</i>      | Haemoglobin $\alpha$ chain                    | -4.41316       | 0.046936    | 2.780855       |
| 25     | <i>HBA</i>      | Haemoglobin $\beta$ chain                     | -4.48538       | 0.044644    | 2.590615       |

**Table 6:** Proteins that were uniquely altered in PD, PDCI & NPH along with their respective fold changes

| SL No. | PD                                  | PDCI                                             | NPH                                                   |
|--------|-------------------------------------|--------------------------------------------------|-------------------------------------------------------|
| 1      | Amyloid precursor protein<br>3.74   | Immunoglobulin heavy constant $\alpha 2$<br>6.00 | Insulin-like growth factor-binding protein 7<br>3.19  |
| 2      | Neuronal pentraxin receptor<br>3.59 | Fibrinogen $\alpha$ chain<br>4.53                | Ceruloplasmin<br>0.70                                 |
| 3      | Chitinase-3-like protein 1<br>3.27  | Apolipoprotein A2<br>1.77                        | Alpha-1 antitrypsin<br>0.58                           |
| 4      | Secretogranin-2 precursor<br>3.24   | Apolipoprotein A1<br>1.73                        | VGF Nerve growth factor<br>0.50                       |
| 5      |                                     | Carnosine Dipeptidase 1<br>0.56                  | Neural cell adhesion molecule L1 like protein<br>0.39 |
| 6      |                                     | Dickkopf 3<br>0.54                               |                                                       |
| 7      |                                     | Thy-1 membrane glycoprotein<br>0.46              |                                                       |
| 8      |                                     | Carboxypeptidase E (CPE)<br>0.46                 |                                                       |
| 9      |                                     | Secretogranin 3 precursor<br>0.34                |                                                       |

**Table 7:** List of processes affected and corresponding gene products in PDCI as per gene ontology A. biological process, B. molecular function and C. cellular component. 6 aspects per category have been represented.

|                                |                                                                                                                                     |
|--------------------------------|-------------------------------------------------------------------------------------------------------------------------------------|
| <b>A. Biological processes</b> | <b>Genes mapped</b>                                                                                                                 |
| Protein metabolism             | <i>FGG, FGB, FGA, SERPING1, SERPINA3, CNDP1, CPE, SCG3</i>                                                                          |
| Cell growth and/or maintenance | <i>GSN, VTN, FBLN1</i>                                                                                                              |
| Transport                      | <i>APOA2, APOA1, HBB</i>                                                                                                            |
| Signal transduction            | <i>AHSG, DKK3, NRCAM</i>                                                                                                            |
| Immune response                | <i>CFH, CLU, ORM2, THY1, ORM1, HP</i>                                                                                               |
| Apoptosis                      | <i>HRG</i>                                                                                                                          |
| <b>B. Molecular functions</b>  | <b>Genes mapped</b>                                                                                                                 |
| Protein binding                | <i>FGG, FGB, FGA, HRG</i>                                                                                                           |
| Defense/Immunity               | <i>AHSG, ORM2, ORM1</i>                                                                                                             |
| Protease inhibitor             | <i>SERPING1, SERPINA3</i>                                                                                                           |
| Complement binding             | <i>CLU</i>                                                                                                                          |
| Transporter activity           | <i>APOA1, APOA2, HP, HBB</i>                                                                                                        |
| Immunoglobulin binding         | <i>HRG</i>                                                                                                                          |
| <b>C. Cellular components</b>  | <b>Genes mapped</b>                                                                                                                 |
| Exosomes                       | <i>FGG, FGB, FGA, GSN, CFH, HRG, VTN, CLU, APOA2, APOA1, AHSG, SERPING1, SERPINA3, THY1, HP, HBB</i>                                |
| Lysosome                       | <i>FGA, GSN, CFH, VTN, CLU, APOA2, APOA1, AHSG, SERPING1, SERPINA3, THY1, ORM1, HP, NRCAM, HBB</i>                                  |
| Extracellular                  | <i>FGG, FGB, FGA, GSN, CFH, HRG, VTN, FBLN1, CLU, APOA2, APOA1, AHSG, SERPING1, ORM2, SERPINA3, DKK3, ORM1, HP, LRG1, SCG3, HBB</i> |
| Membrane                       | <i>THY1, LRG1</i>                                                                                                                   |
| Neuron projection              | <i>NRCAM</i>                                                                                                                        |

**Table 8:** List of processes affected and corresponding gene products in PD as per gene ontology. A. biological process, B. molecular function and C. cellular component. 6 aspects per category have been represented.

| <b>A. Biological processes</b>              | <b>Genes mapped</b>                                       |
|---------------------------------------------|-----------------------------------------------------------|
| Protein metabolism                          | <i>FGB, FGG, SCG2</i>                                     |
| Cell growth and/or maintenance              | <i>FBLN1, CHI3L1</i>                                      |
| Transport                                   | <i>HBB</i>                                                |
| Signal transduction                         | <i>APP, NPTXR</i>                                         |
| Immune response                             | <i>ORM1</i>                                               |
| Apoptosis                                   | <i>HRG</i>                                                |
| <b>B. Molecular functions</b>               | <b>Genes mapped</b>                                       |
| Extracellular matrix structural constituent | <i>FBLN1, CHI3L1</i>                                      |
| Receptor activity                           | <i>APP, NPTXR</i>                                         |
| Defense/immunity protein activity           | <i>ORM1</i>                                               |
| Metal ion binding                           | <i>HRG</i>                                                |
| Complement binding                          | <i>HRG</i>                                                |
| Immunoglobulin binding                      | <i>HRG</i>                                                |
| Polysaccharide binding                      | <i>HRG</i>                                                |
| <b>C. Cellular components</b>               | <b>Genes mapped</b>                                       |
| Lysosome                                    | <i>APP, ORM1, HBB</i>                                     |
| Extracellular                               | <i>FGB, FGG, APP, FBLN1, CHI3L1, HRG, ORM1, LRG1, HBB</i> |
| Extracellular region                        | <i>FGB, FGG, APP, FBLN1, HRG, ORM1, LRG1</i>              |
| Dendritic spine                             | <i>APP</i>                                                |
| Fibrinogen complex                          | <i>FGB, FGG</i>                                           |

**Table 9:** List of processes affected and corresponding gene products in NPH as per gene ontology A. biological process, B. molecular function and C. cellular component. 6 aspects per category have been represented.

| <b>A. Biological process</b>      | <b>Genes mapped</b>                                                                                                             |
|-----------------------------------|---------------------------------------------------------------------------------------------------------------------------------|
| Protein metabolism                | <i>FGB, FGG, SERPINA1, SERPING1, SERPINA3</i>                                                                                   |
| Cell growth and/or maintenance    | <i>GSN, FBLN1, VTN</i>                                                                                                          |
| Cell communication                | <i>IGFBP7, AHSG, NELL2, VGF</i>                                                                                                 |
| Signal transduction               | <i>IGFBP7, AHSG, NELL2, VGF, NRCAM</i>                                                                                          |
| Immune response                   | <i>CFH, CLU, ORM2, ORM1, HP</i>                                                                                                 |
| Apoptosis                         | <i>HRG</i>                                                                                                                      |
| <b>B. Molecular function</b>      | <b>Genes mapped</b>                                                                                                             |
| Protease inhibitor activity       | <i>SERPINA1, SERPING1, SERPINA3</i>                                                                                             |
| Defense/immunity protein activity | <i>AHSG, ORM2, ORM1</i>                                                                                                         |
| Protein binding                   | <i>FGB, FGG, HRG</i>                                                                                                            |
| Complement binding                | <i>CFH, HRG</i>                                                                                                                 |
| Immunoglobulin binding            | <i>HRG</i>                                                                                                                      |
| Polysaccharide binding            | <i>HRG</i>                                                                                                                      |
| <b>C. Cellular component</b>      | <b>Genes mapped</b>                                                                                                             |
| Exosomes                          | <i>FGB, GSN, FGG, VTN, CFH, HRG, CLU, AHSG, CP, SERPINA1, SERPING1, SERPINA3, HP, HBB</i>                                       |
| Lysosome                          | <i>GSN, VTN, CFH, CLU, AHSG, CP, SERPINA1, SERPING1, SERPINA3, ORM1, NRCAM, HP, HBB</i>                                         |
| Extracellular                     | <i>FGB, GSN, FGG, FBLN1, IGFBP7, VTN, CFH, HRG, CLU, AHSG, CP, ORM2, SERPINA1, SERPING1, VGF, SERPINA3, ORM1, LRG1, HP, HBB</i> |
| Cytoskeleton                      | <i>FGB, GSN, FGG, CLU</i>                                                                                                       |
| Fibrinogen complex                | <i>FGB, FGG</i>                                                                                                                 |
| Neuron projection                 | <i>NRCAM</i>                                                                                                                    |

**Table 10. LFQ intensities vs ELISA protein concentration.**

Spearman's rho correlation between LFQ intensities and ELISA based concentrations of the highly up-regulated proteins in PDCI. Note a positive correlation (\*) between LFQ intensity of fibrinogen alpha chain (FGA) and concentration of native fibrinogen. LFQ intensity of CFAH showed positive correlation with the concentration of fibrinogen native protein.

|                        |                         | ELISA              |                  |              |                |                 |                              |
|------------------------|-------------------------|--------------------|------------------|--------------|----------------|-----------------|------------------------------|
|                        |                         | Fibrinogen (ng/ml) | Gelsolin (ug/ml) | CFAH (pg/ml) | ApoA-I (ug/ml) | ApoA-IV (pg/ml) | ApoA-I: ApoA-IV <sup>#</sup> |
| <b>LFQ intensities</b> |                         |                    |                  |              |                |                 |                              |
| <b>FGA</b>             | Correlation Coefficient | .750*              | -.233            | -.150        | .200           | .143            | .024                         |
|                        | Sig. (2-tailed)         | .020               | .546             | .700         | .606           | .736            | .955                         |
|                        | N                       | 9                  | 9                | 9            | 9              | 8               | 8                            |
| <b>FGB</b>             | Correlation Coefficient | .420               | -.210            | .098         | -.280          | .539            | -.418                        |
|                        | Sig. (2-tailed)         | .175               | .513             | .762         | .379           | .108            | .229                         |
|                        | N                       | 12                 | 12               | 12           | 12             | 10              | 10                           |
| <b>FGG</b>             | Correlation Coefficient | .253               | -.253            | -.053        | -.226          | .363            | -.335                        |
|                        | Sig. (2-tailed)         | .345               | .345             | .846         | .399           | .223            | .263                         |
|                        | N                       | 16                 | 16               | 16           | 16             | 13              | 13                           |
| <b>CFAH</b>            | Correlation Coefficient | .460*              | -.145            | .244         | -.004          | .408            | -.337                        |
|                        | Sig. (2-tailed)         | .036               | .529             | .286         | .987           | .093            | .171                         |
|                        | N                       | 21                 | 21               | 21           | 21             | 18              | 18                           |
| <b>Gelsolin</b>        | Correlation Coefficient | -.130              | .242             | -.229        | -.387          | .042            | -.065                        |
|                        | Sig. (2-tailed)         | .575               | .291             | .319         | .083           | .868            | .798                         |
|                        | N                       | 21                 | 21               | 21           | 21             | 18              | 18                           |
| <b>APOA4</b>           | Correlation Coefficient | .334               | -.213            | .257         | -.117          | .222            | -.253                        |
|                        | Sig. (2-tailed)         | .139               | .354             | .260         | .614           | .376            | .311                         |
|                        | N                       | 21                 | 21               | 21           | 21             | 18              | 18                           |
| <b>APOA1</b>           | Correlation Coefficient | .391               | -.273            | .319         | .021           | .245            | -.302                        |
|                        | Sig. (2-tailed)         | .080               | .232             | .158         | .929           | .328            | .223                         |
|                        | N                       | 21                 | 21               | 21           | 21             | 18              | 18                           |

<sup>#</sup> derived from pg/ml Apo-AI and Apo-AIV)

**Table 11:** Group wise Kendall's correlation between neuropsychological test percentiles and ELISA derived concentration of proteins viz. Fibrinogen, CFAH, ApoA-I, ApoA-IV, ApoA-I:ApoA-IV in PDCI. Significant correlation coefficients and p-values are denoted (\*).

|                                  |                         | ELISA              |              |                |                 |                |
|----------------------------------|-------------------------|--------------------|--------------|----------------|-----------------|----------------|
| Neuropsychological test          | Comparisons             | Fibrinogen (ng/ml) | CFAH (pg/ml) | ApoA-I (ug/ml) | ApoA-IV (pg/ml) | ApoAI: ApoA-IV |
| Digit vigilance total time (TT)  | Correlation Coefficient | .316               | .949*        | -.105          | .333            | -.333          |
|                                  | Sig. (2-tailed)         | .448               | .023         | .801           | .602            | .602           |
|                                  | N                       | 5                  | 5            | 5              | 3               | 3              |
| ANT                              | Correlation Coefficient | -.433              | .355         | .355           | -.894*          | .894*          |
|                                  | Sig. (2-tailed)         | .154               | .244         | .244           | .037            | .037           |
|                                  | N                       | 8                  | 8            | 8              | 5               | 5              |
| Verbal N back 2 error            | Correlation Coefficient | 0.000              | .390         | .683*          | -1.000*         | 1.000*         |
|                                  | Sig. (2-tailed)         | 1.000              | .224         | .033           |                 |                |
|                                  | N                       | 7                  | 7            | 7              | 5               | 5              |
| WCST No. of categories completed | Correlation Coefficient | -.788*             | -.215        | .358           | -.527           | .527           |
|                                  | Sig. (2-tailed)         | .032               | .559         | .330           | .207            | .207           |
|                                  | N                       | 6                  | 6            | 6              | 5               | 5              |

(\* derived from pg/ml Apo-AI and Apo-AIV)
